# Supplementary material
Source: PubMed Central journal article supplement (PMC4964871)
Supplement: ml500154q_si_001.pdf [file ml500154q_si_001.pdf]

## ***Supporting Information***

### **Indoliny-thiazole based inhibitors of Scavenger Receptor-BI (SR-BI)-mediated lipid transport**

Chris Dockendorff,<sup>\*,†,§</sup> Patrick W. Faloon,<sup>†</sup> Miao Yu,<sup>‡</sup> Willmen Youngsaye, Marsha Penman,<sup>‡</sup> Thomas J. F. Nieland,<sup>‡</sup> Partha P. Nag,<sup>†</sup> Timothy A. Lewis,<sup>†</sup> Jun Pu,<sup>†</sup> Melissa Bennion,<sup>†</sup> Joseph Negri,<sup>†</sup> Conor Paterson,<sup>†</sup> Garrett Lam,<sup>†</sup> Sivaraman Dandapani,<sup>†</sup> José R. Perez,<sup>†</sup> Benito Munoz,<sup>†</sup> Michelle A. Palmer,<sup>†</sup> Stuart L. Schreiber<sup>†,∞</sup> and Monty Krieger<sup>\*,‡</sup>

<sup>†</sup> Center for the Science of Therapeutics, Broad Institute, 7 Cambridge Center, Cambridge, MA, 02142, USA

<sup>§</sup> Department of Chemistry, Marquette University, P.O. Box 1881, Milwaukee, WI, 53201-1881, USA

<sup>‡</sup> Department of Biology, Massachusetts Institute of Technology, 77 Massachusetts Avenue, Cambridge, MA, 02139, USA

<sup>∞</sup> Howard Hughes Medical Institute, Broad Institute, 7 Cambridge Center, Cambridge, MA, 02142, USA

### **Contents**

1. Additional SAR data: Table S1
2. Synthesis and characterization data for **17-11** (ML278)
3. Dose-response for [<sup>3</sup>H]cholesteryl ester uptake assay: Figure S1
4. Probe comparison: Table S2
5. Compound profiling protocols
6. Assay protocols
7. References
8. Off-target screening data for **17-11** (ML278)

# 1. Additional SAR data

**Table S1.** Modifications to indoline ring<sup>a</sup>

| Cmp | Structure | IC <sub>50</sub><br>( $\mu$ M) <sup>a</sup> | Cmp | Structure | IC <sub>50</sub><br>( $\mu$ M) <sup>a</sup> |
|-----|-----------|---------------------------------------------|-----|-----------|---------------------------------------------|
| 18  |           | 0.089                                       | 23  |           | 0.012                                       |
| 19  |           | 2.0                                         | 24  |           | 0.20                                        |
| 20  |           | 0.085<br>±0.02                              | 25  |           | 0.09                                        |
| 21  |           | 0.2                                         | 26  |           | 0.40                                        |
| 22  |           | 0.020                                       | 27  |           | 0.07                                        |
|     |           |                                             | 28  |           | 0.09                                        |

<sup>a</sup> Average of at least two measurements in diI uptake assay,  $\pm$  standard of mean when  $n > 2$ .

## 2. Synthesis and characterization data for 17-11 (ML278)

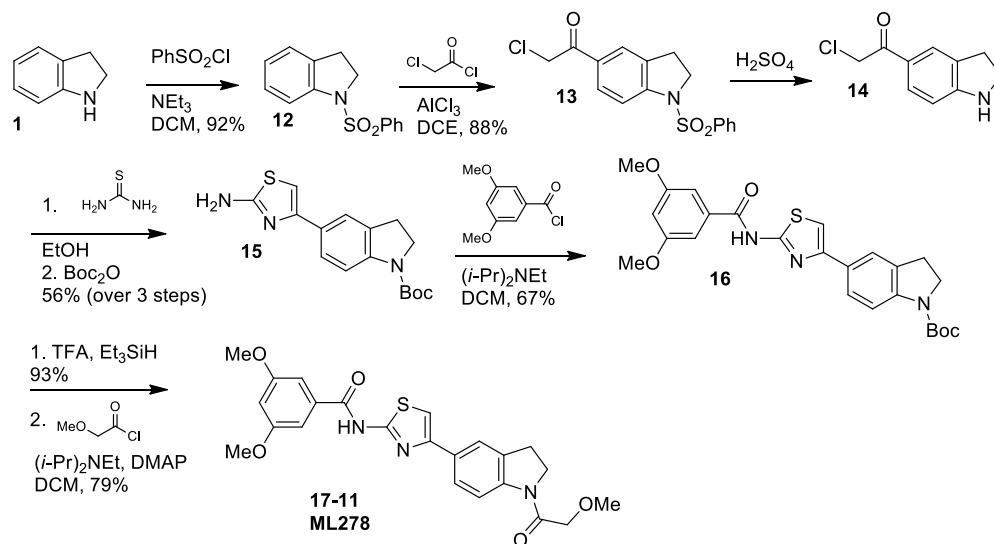

**General Details.** All reagents and solvents were purchased from commercial vendors and used as received. NMR spectra were recorded on a Bruker 300 MHz or Varian UNITY INOVA 500 MHz spectrometer as indicated. Proton and carbon chemical shifts are reported in parts per million (ppm;  $\delta$ ) relative to tetramethylsilane,  $\text{CDCl}_3$  solvent, or  $d_6$ -DMSO ( $^1\text{H}$   $\delta$  0,  $^{13}\text{C}$   $\delta$  77.16, or  $^{13}\text{C}$   $\delta$  39.5, respectively). NMR data are reported as follows: chemical shifts, multiplicity (obs. = obscured, app = apparent, br = broad, s = singlet, d = doublet, t = triplet, m = multiplet, comp = complex overlapping signals); coupling constant(s) in Hz; integration. Unless otherwise indicated, NMR data were collected at 25 °C. Flash chromatography was performed using 40-60  $\mu\text{m}$  Silica Gel on a Teledyne Isco Combiflash  $R_f$  system. Tandem liquid chromatography/mass spectrometry (LCMS) was performed on a Waters 2795 separations module and Waters 3100 mass detector. Analytical thin layer chromatography (TLC) was performed on EM Reagent 0.25 mm silica gel 60-F plates. Visualization was accomplished with UV light and aqueous potassium permanganate ( $\text{KMnO}_4$ ) stain followed by heating. High-resolution mass spectra were obtained at the MIT Mass Spectrometry Facility with a Bruker Daltonics APEXIV 4.7 Tesla Fourier Transform Ion Cyclotron Resonance mass spectrometer. Compound purity and identity were determined by UPLC-MS (Waters, Milford, MA). Purity was measured by UV absorbance at 210 nm. Identity was determined on a SQ mass spectrometer by positive electrospray ionization. Mobile Phase A consisted of either 0.1% ammonium hydroxide or 0.1% trifluoroacetic acid in water, while mobile Phase B consisted of the same additives in acetonitrile. The gradient ran from 5% to 95% mobile Phase B over 0.8 minutes at 0.45 ml/min. An Acquity BEH C18, 1.7  $\mu\text{m}$ , 1.0 x 50 mm column was used with column temperature maintained at 65 °C. Compounds were dissolved in DMSO at a nominal concentration of 1 mg/ml, and 0.25  $\mu\text{l}$  of this solution was injected.

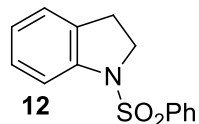

**1-(Phenylsulfonyl)indoline (12):** Indoline (1.4 ml, 12.6 mmol) was placed in a round-bottom flask equipped with a magnetic stirbar and dissolved in dichloromethane (42.0 ml). After cooling to 0 °C, triethylamine (3.5 ml, 25.2 mmol) was added to the solution, followed by benzenesulfonyl chloride (1.7 ml, 13.3 mmol). The reaction was stirred for 30 minutes while warming to room temperature. Saturated sodium bicarbonate solution (aqueous, 30 ml) was added to quench the reaction. The layers were separated, and the aqueous layer was extracted with dichloromethane (3 x 25 ml). The combined organics were washed with brine (25 ml), then shaken over magnesium sulfate, filtered, and concentrated under reduced pressure to give a light tan solid. The crude material was purified by column chromatography over silica gel (hexanes/ethyl acetate: 100/0 to 80/20) to give the title compound as a light pink solid (3.00 g, 92 %). **<sup>1</sup>H NMR (300 MHz, CDCl<sub>3</sub>):** δ 7.82 – 7.77 (m, 2H), 7.66 (d, *J* = 8.0 Hz, 1H), 7.55 (t, *J* = 7.4 Hz, 1H), 7.44 (t, *J* = 7.9 Hz, 2H), 7.20 (t, *J* = 7.8 Hz, 1H), 7.08 (d, *J* = 7.4 Hz, 1H), 6.98 (t, *J* = 7.4 Hz, 1H), 3.93 (t, *J* = 8.4 Hz, 2H), 2.89 (t, *J* = 8.4 Hz, 2H); **MS (ESI<sup>+</sup>):** 260 (M+H).

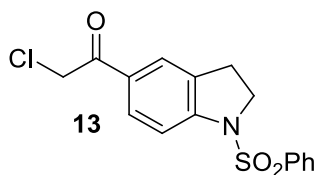

**2-Chloro-1-(1-(phenylsulfonyl)indolin-5-yl)ethanone (13):** A round-bottom flask was charged with a magnetic stirbar and anhydrous aluminum chloride (1.70 g, 12.7 mmol) then placed under nitrogen atmosphere. Anhydrous 1,2-dichloroethane (28 ml) was added to produce a pale yellow suspension. Chloroacetyl chloride (1.0 ml, 12.7 mmol) was added slowly by syringe. The mixture was stirred at room temperature for 30 minutes. A solution of 1-(phenylsulfonyl)indoline (3.00 g, 11.6 mmol) in anhydrous 1,2-dichloroethane (8.0 ml) was slowly added to the reaction by syringe. The syringe was rinsed twice with anhydrous 1,2-dichloroethane (3.0 ml), and the rinses were added to the reaction. The reaction, now a dark green mixture, was heated to 50 °C and stirred for 4 hours. Additional portions of aluminum chloride (1.30 g, 9.7 mmol) and chloroacetyl chloride (0.75 ml, 9.5 mmol) were dissolved in anhydrous 1,2-dichloroethane (10 ml) and added to the reaction. After stirring 2 more hours at 50 °C, 5 ml of anhydrous 1,2-dichloroethane containing another 0.8 g (6.0 mmol) of aluminum chloride and 0.5 ml (6.4 mmol) of chloroacetyl chloride was added. Stirring at 50 °C was continued for another hour to complete the reaction. The dark red mixture was slowly poured into ice water (approx. 250 ml) and further diluted with dichloromethane (200 ml). The resulting cloudy, orange mixture was stirred while warming to room temperature, after which the layers were separated and the aqueous phase was extracted with dichloromethane (3 x 100 ml). The combined organic layers were washed with water (100 ml) and brine (100 ml), then shaken over magnesium sulfate, filtered, and

concentrated under reduced pressure to give a brown solid (3.91 g). The crude material was purified by column chromatography over silica gel (hexanes/ethyl acetate: 100/0 to 0/100) to give the title compound as a tan solid (3.41 g, 88 %).  $^1\text{H NMR}$  (300 MHz,  $\text{CDCl}_3$ ):  $\delta$  7.87 – 7.81 (m, 3H), 7.75 – 7.69 (m, 2H), 7.65 – 7.57 (m, 1H), 7.54 – 7.47 (m, 2H), 4.63 (s, 2H), 4.01 (t,  $J = 8.6$  Hz, 2H), 3.05 (t,  $J = 8.6$  Hz, 2H);  $\text{MS}$  ( $\text{ESI}^+$ ): 336 (M+H).

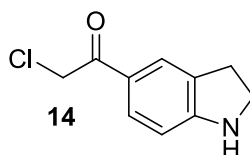

**2-Chloro-1-(indolin-5-yl)ethanone (14):** A microwave tube was charged with a magnetic stirbar and 2-chloro-1-(1-(phenylsulfonyl)indolin-5-yl)ethanone (3.26 g, 9.54 mmol). Concentrated sulfuric acid (9.0 ml) was added, and the resulting suspension was microwaved for 10 minutes at 100 °C. The reaction was carefully poured into ice water (500 ml). The dark mixture was stirred while warming to room temperature then treated with 10% (w/v) aqueous sodium hydroxide (approximately 200 ml) until the pH >10. This mixture was then extracted with dichloromethane (3 x 250 ml). The combined extracts were washed with brine (200 ml), then shaken over magnesium sulfate, filtered, and concentrated under reduced pressure to give a brown solid (1.52 g). This material was used immediately without further purification.  $^1\text{H NMR}$  (300 MHz,  $\text{CDCl}_3$ ):  $\delta$  7.72 (d,  $J = 1.2$  Hz, 1H), 7.69 (dd,  $J = 8.3, 1.6$  Hz, 1H), 6.54 (d,  $J = 8.2$  Hz, 1H), 4.60 (s, 2H), 3.70 (t,  $J = 8.6$  Hz, 2H), 3.09 (t,  $J = 8.6$  Hz, 2H);  $\text{MS}$  ( $\text{ESI}^+$ ): 196 (M+H).

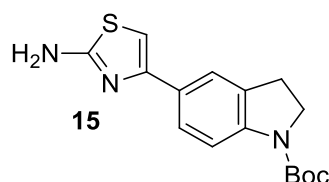

**tert-Butyl 5-(2-aminothiazol-4-yl)indoline-1-carboxylate (15):** 2-Chloro-1-(indolin-5-yl)ethanone (1.52 g, 7.75 mmol) was placed in a microwave vial and dissolved in anhydrous ethanol (30.0 mL) to give an opaque, black solution. Thiourea (0.66 g, 8.67 mmol) was added and the resulting mixture was microwaved for 30 minutes at 120 °C. 4-(*N,N*-Dimethylamino)pyridine (95.0 mg, 0.78 mmol) and *N,N*-diisopropylethylamine (1.5 ml, 9.3 mmol) were added to the reaction mixture. Neat di-*tert*-butyl dicarbonate (2.0 mL, 8.52 mmol) was added last, and the reaction was stirred at room temperature for 1 hour. The opaque, red-brown mixture was concentrated under reduced pressure to give a red-brown solid. This material was partitioned between water (50 ml) and ethyl acetate (75 ml) and stirred at room temperature until everything dissolved. The layers were separated and the aqueous phase was extracted with ethyl acetate (3 x 50 ml). The combined organic extracts were shaken over magnesium sulfate, filtered, and concentrated under reduced pressure to give an orange-brown solid. The crude material was purified by column chromatography over silica gel (hexanes/ethyl acetate: 100/0 to 40/60) to give the title compound as an orange solid (1.72 g, 56 % over three steps).  $^1\text{H NMR}$

(300 MHz,  $d_6$ -DMSO):  $\delta$  7.61 (s, 1H), 7.60 (d,  $J = 8.1$  Hz, 1H), 6.99 (s, 1H), 6.85 (s, 1H), 3.92 (t,  $J = 8.7$  Hz, 2H), 3.07 (t,  $J = 8.7$  Hz, 2H), 1.51 (s, 9H); MS (ESI<sup>+</sup>): 318 (M+H).

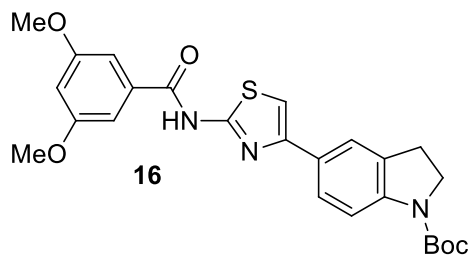

**tert-Butyl 5-(2-(3,5-dimethoxybenzamido)thiazol-4-yl)indoline-1-carboxylate (16):** In a round-bottom flask equipped with a magnetic stirbar, *tert*-butyl 5-(2-aminothiazol-4-yl)indoline-1-carboxylate (0.500 g, 1.58 mmol) was combined with 4-(*N,N*-dimethylamino)pyridine (19.0 mg, 0.16 mmol). Dichloromethane (4.0 ml) was added to produce an orange suspension that was cooled to 0 °C. *N,N*-Diisopropylethylamine (0.33 ml, 1.89 mmol) was added followed by a solution of 3,5-dimethoxybenzoyl chloride (0.35 g, 1.73 mmol) in dichloromethane (1.00 ml). The bright orange mixture was stirred for 1 hour while warming to room temperature. The resulting clear, red-brown solution was diluted with saturated sodium bicarbonate solution (aqueous, 10 ml) and dichloromethane (10 ml). The layers were separated, and the aqueous phase was extracted with dichloromethane (3 x 10 ml). The combined organics were washed with brine (10 ml) then shaken over magnesium sulfate, filtered, and concentrated under reduced pressure to give a thick, orange-brown oil. This material was purified by column chromatography over silica gel (hexanes/ethyl acetate: 100/0 to 70/30) to give the title compounds as a light yellow solid (0.51 g, 67%). <sup>1</sup>H NMR (300 MHz, CDCl<sub>3</sub>):  $\delta$  9.84 (s, 1H), 7.60 (d,  $J = 12.2$  Hz, 1H), 7.58 (s, 1H), 7.07 (s, 1H), 7.04 (s, 1H), 7.03 (s, 1H), 6.64 (t,  $J = 2.2$  Hz, 1H), 4.01 (t,  $J = 8.7$  Hz, 2H), 3.84 (s, 6H), 3.12 (t,  $J = 8.7$  Hz, 2H), 1.58 (s, 9H); MS (ESI<sup>+</sup>): 482 (M+H).

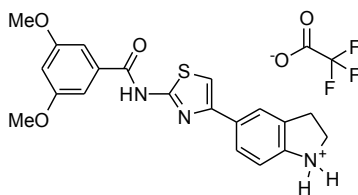

***N*-(4-(indolin-5-yl)thiazol-2-yl)-3,5-dimethoxybenzamide, trifluoroacetic acid salt:** *tert*-Butyl 5-(2-(3,5-dimethoxybenzamido)thiazol-4-yl)indoline-1-carboxylate (0.38 g, 0.79 mmol) was placed in a round-bottom flask with a magnetic stirbar and dissolved in dichloromethane (5.3 mL) to give a clear, yellow solution. Triethylsilane (1.3 mL, 7.93 mmol) was added followed by 2,2,2-trifluoroacetic acid (1.2 mL, 15.9 mmol), and the reaction quickly turned light orange and produced a gas. The reaction was stirred at room temperature for 1 hour. The light pink reaction was concentrated under reduced pressure to give a rose-colored solid. The crude material was suspended in diethyl ether (10 ml) and filtered. The collected solids were washed

with additional diethyl ether and air dried on the filter to give the title compound as light purple solid (0.36 g, 93 %). **<sup>1</sup>H NMR (300 MHz, CD<sub>3</sub>OD):** δ 8.05 (s, 1H), 7.99 (d, *J* = 10.0 Hz, 1H), 7.51 (s, 1H), 7.39 (d, *J* = 8.3 Hz, 1H), 7.20 (s, 1H), 7.20 (s, 1H), 6.74 (s, 1H), 3.87 (s, 6H), 3.85 (t, *J* = 7.8 Hz, 2H), 3.35 (t, *J* = 7.7 Hz, 2H); **MS (ESI<sup>+</sup>):** 382 (M+H).

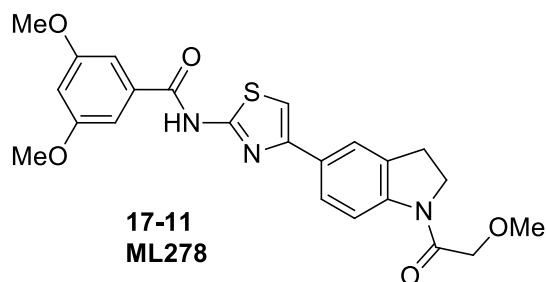

**3,5-Dimethoxy-*N*-(4-(1-(2-methoxyacetyl)indolin-5-yl)thiazol-2-yl)benzamide (17-11, ML278):** A round-bottom flask equipped with a magnetic stir bar was charged with 5-(2-(3,5-dimethoxybenzamido)thiazol-4-yl)indolinium 2,2,2-trifluoroacetate (75.0 mg, 0.15 mmol). Dichloromethane (1.5 ml) was added to produce a purple suspension that was cooled to 0 °C. 4-(*N,N*-Dimethylamino)pyridine (1.8 mg, 0.015 mmol) was added, followed by *N,N*-diisopropylethylamine (79 μl, 0.45 mmol) to give a clear, dark solution. 2-Methoxyacetyl chloride (15 μl, 0.17 mmol) was added last. The reaction was warmed to room temperature and stirred for 1 hour. The cloudy, tan mixture was diluted with dichloromethane (2 ml) and quenched with saturated sodium bicarbonate (aqueous, 2 ml). The layers were separated, and the aqueous portion was extracted with additional hot ethyl acetate (5 x 3 ml), with both layers heated to ~50 °C. The combined organic layers were shaken over magnesium sulfate, filtered, and concentrated under reduced pressure to give a light tan solid. The crude material was purified by column chromatography over silica gel (dichloromethane/methanol: 100/0 to 97/3) to give the title compound as an off-white solid (54.3 mg, 79 %). **<sup>1</sup>H NMR (300 MHz, CDCl<sub>3</sub>):** δ 10.14 (s, 1H), 8.23 (d, *J* = 8.3 Hz, 1H), 7.63 (d, *J* = 8.4 Hz, 1H), 7.60 (s, 1H), 7.11 (s, 1H), 7.01 (d, *J* = 1.9 Hz, 3H), 6.61 (t, *J* = 2.0 Hz, 1H), 4.18 (s, 2H), 4.07 (t, *J* = 8.3 Hz, 2H), 3.81 (s, 8H), 3.53 (s, 4H), 3.22 (t, *J* = 8.2 Hz, 2H). **<sup>13</sup>C NMR (125 MHz, CDCl<sub>3</sub>):** δ 167.2, 164.6, 161.1, 158.2, 150.0, 142.7, 133.9, 131.4, 130.3, 125.7, 122.2, 117.1, 107.3, 105.2, 105.0, 72.3, 59.4, 55.6, 46.8, 28.2. **HRMS (ESI<sup>+</sup>):** calculated for C<sub>23</sub>H<sub>24</sub>N<sub>3</sub>O<sub>5</sub>S [M+H] 454.1437, found 454.1420.

# <sup>1</sup>H NMR Spectrum (300 MHz, CDCl<sub>3</sub>) of Probe 1 (ML278)

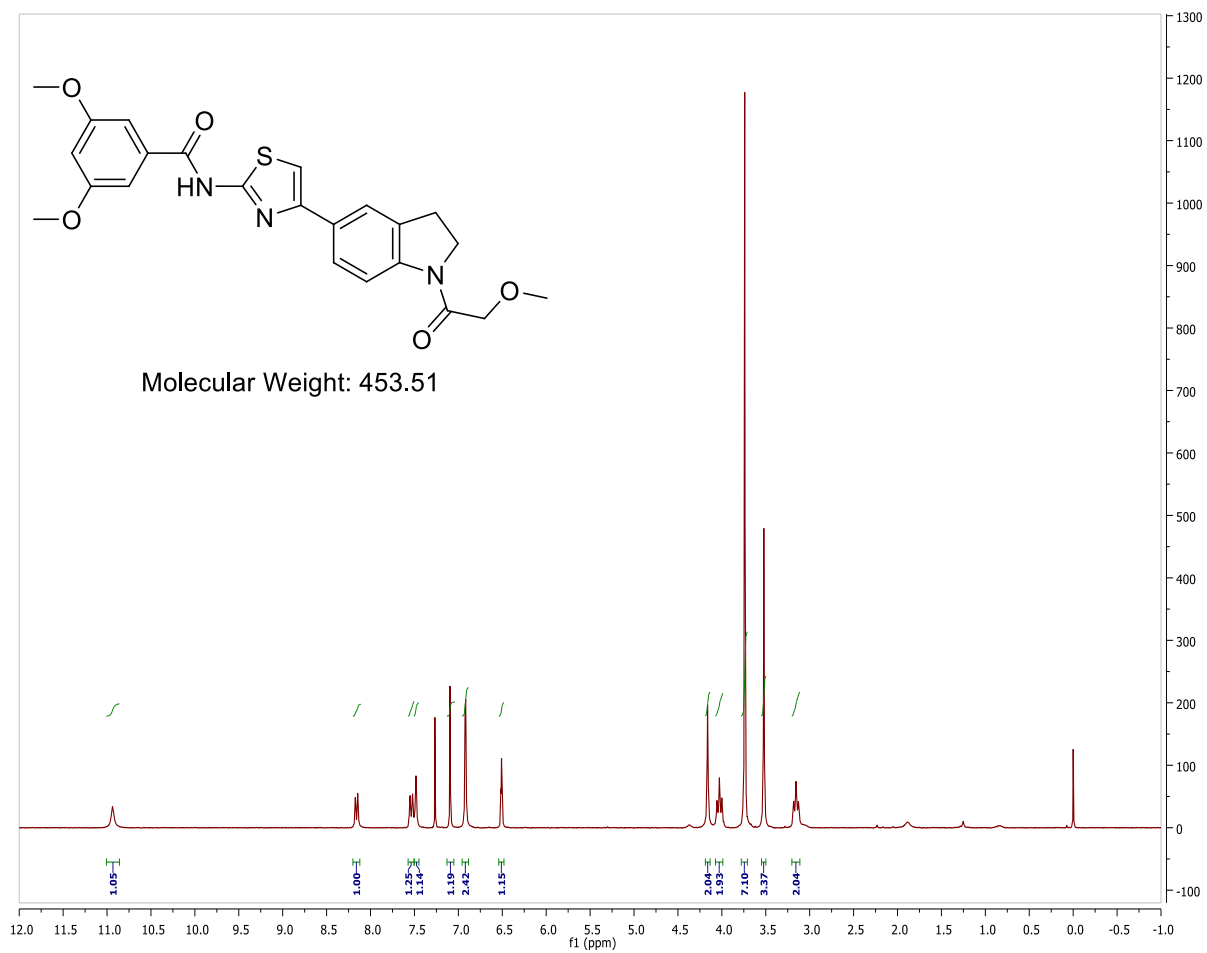



### $^{13}\text{C}$ NMR Spectrum (125 MHz, $\text{CDCl}_3$ ) of Probe 1 (ML278)

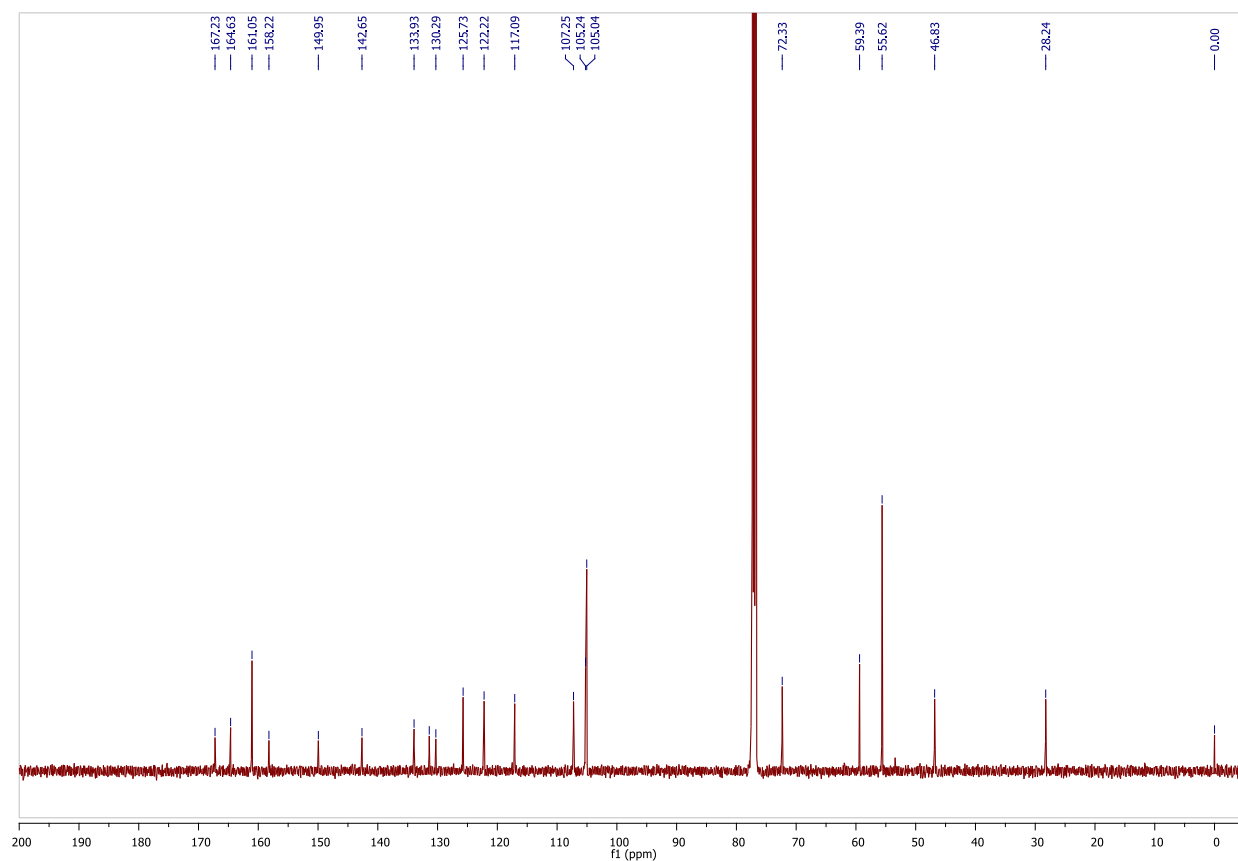

### UPLC-MS Chromatogram of Probe 1 FW = 453.51 (ML278)

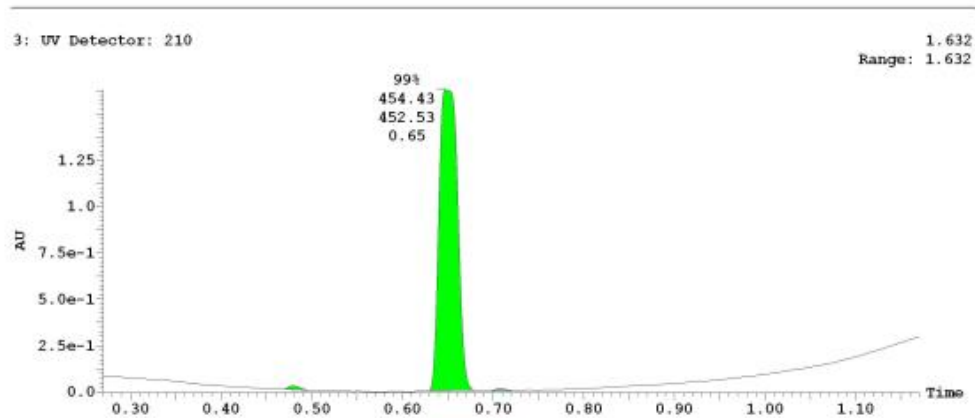

### 3. Dose-response for [<sup>3</sup>H]cholesteryl ester uptake assay

**Figure S1.** Dose-response for [<sup>3</sup>H]cholesteryl oleate ester uptake from HDL particles to IdlA[m-SR-BI] cells. Non-selective uptake (~5% of maximal uptake, see assay protocol) was quantified and subtracted from each uptake measurement prior to analysis. Points indicate the mean of  $n = 3$ , error bars indicate S.E.M. Uptake with no added inhibitor (ligand concentration = 0) was  $7762 \pm 302$  cpm. IC<sub>50</sub>s were determined (Table S2) and curves were plotted using non-linear regression analysis (4 parameters), using GraphPad Prism v. 6.

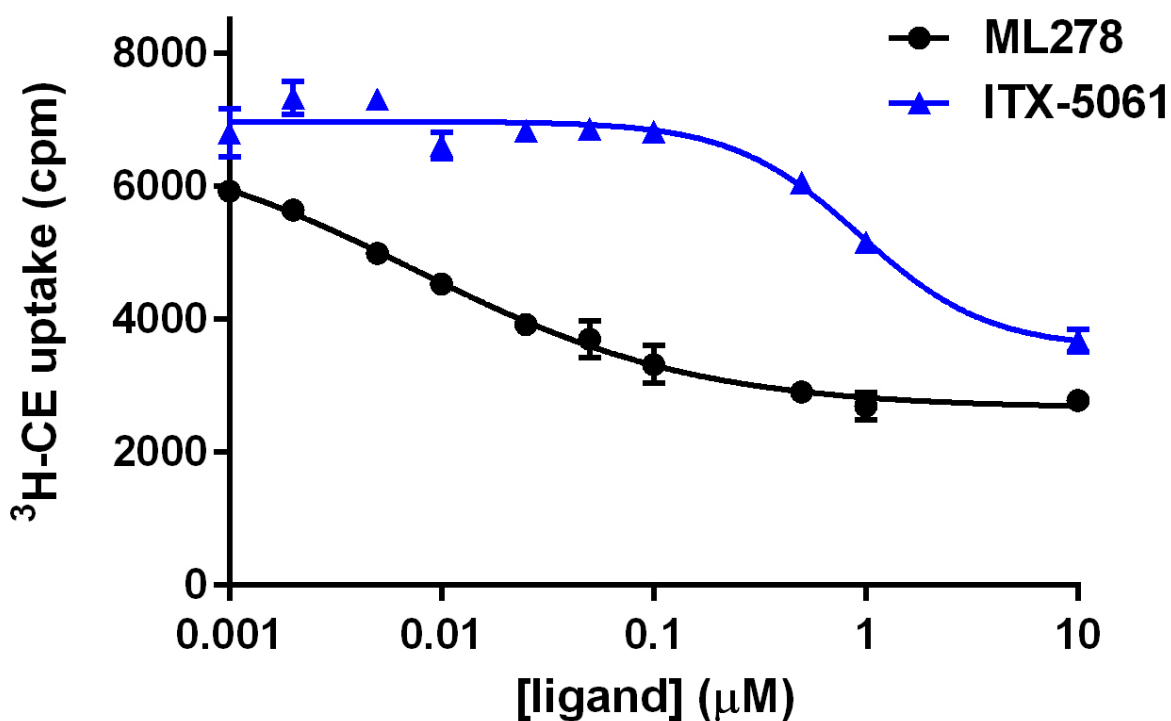

## 4. Probe comparison

**Table S2.** Comparison of SR-BI probes to prior art compounds<sup>a</sup>

| Property                                                                             | BLT-1                             | ITX-5061                                       | ML278 (17-11)                                  |
|--------------------------------------------------------------------------------------|-----------------------------------|------------------------------------------------|------------------------------------------------|
| Inhibition of Dil-HDL uptake in IdIA[mSR-BI] cells: IC <sub>50</sub>                 | 0.011±0.002 μM                    | 0.254 μM                                       | 0.006±0.0003 μM                                |
| Inhibition of [ <sup>3</sup> H]CE-HDL uptake in IdIA[mSR-BI] cells: IC <sub>50</sub> | 0.05 μM                           | 0.94 μM                                        | 0.007 μM                                       |
| Increase in Alexa488-HDL binding with IdIA[mSR-BI] cells: IC <sub>50</sub>           | 0.09 μM                           | NT                                             | 0.035 μM                                       |
| Selectivity; receptor mediated endocytosis                                           | No effect at up to 35 μM          | No effect at up to 35 μM                       | No effect at up to 35 μM                       |
| Reversible                                                                           | No <sup>1</sup>                   | NT                                             | Yes                                            |
| Cellular toxicity in IdIA[mSR-BI]                                                    | CC <sub>50</sub> = 2.1 μM at 24 h | Non-toxic with CC <sub>50</sub> >35 μM at 24 h | Non-toxic with CC <sub>50</sub> >35 μM at 24 h |
| PBS Solubility (1% DMSO, pH 7.4, 23 °C)                                              | 1.3 μM                            | <1 μM                                          | 0.57 μM                                        |
| Plasma protein binding, % bound (mouse, human)                                       | NT                                | NT                                             | >99%, 94%                                      |
| Plasma stability, % remaining after 5 h (mouse, human)                               | NT                                | NT                                             | >99%, >99%                                     |
| Microsomal stability, % remaining after 1 h (mouse, human)                           | NT                                | NT                                             | 75%, 48%                                       |

<sup>a</sup> Average of at least two measurements in Dil uptake assay, ± standard error of mean when n > 2. NT = not tested.

## 5. Compound profiling protocols

**Solubility.** Solubility was determined in phosphate buffered saline (PBS) pH 7.4 with 1% DMSO. Each compound was prepared in duplicate at 100 μM in both 100% DMSO and PBS with 1% DMSO. Compounds were allowed to equilibrate at room temperature with a 250 rpm orbital shake for 24 hours. After equilibration, samples were analyzed by UPLC-MS (Waters, Milford, MA) with compounds detected by SIR detection on a single quadrupole mass spectrometer. The DMSO samples were used to create a two-point calibration curve to which the response in PBS was fit.

**Plasma Protein Binding.** Plasma protein binding was determined by equilibrium dialysis using the Rapid Equilibrium Dialysis (RED) device (Pierce Biotechnology, Rockford, IL) for both human and mouse plasma. Each compound was prepared in duplicate at 5  $\mu$ M in plasma (0.95% acetonitrile, 0.05% DMSO) and added to one side of the membrane (200  $\mu$ l) with PBS pH 7.4 added to the other side (350  $\mu$ l). Compounds were incubated at 37  $^{\circ}$ C for 5 hours with a 250-rpm orbital shake. After incubation, samples were analyzed by UPLC-MS (Waters, Milford, MA) with compounds detected by SIR detection on a single quadrupole mass spectrometer.

**Plasma Stability.** Plasma stability was determined at 37  $^{\circ}$ C at 5 hours in both human and mouse plasma. Each compound was prepared in duplicate at 5  $\mu$ M in plasma diluted 50/50 (v/v) with PBS pH 7.4 (0.95% acetonitrile, 0.05% DMSO). Compounds were incubated at 37  $^{\circ}$ C for 5 hours with a 250-rpm orbital shake with time points taken at 0 hours and 5 hours. Samples were analyzed by UPLC-MS (Waters, Milford, MA) with compounds detected by SIR detection on a single quadrupole mass spectrometer.

**Microsomal Stability.** Microsomal stability was determined at 37  $^{\circ}$ C at 60 minutes in both human and mouse microsomes. Each compound was prepared in duplicate at 1  $\mu$ M with 0.3 mg/mL microsomes in PBS pH 7.4 (1% DMSO). Compounds were incubated at 37  $^{\circ}$ C for 60 minutes with a 350-rpm orbital shake with time points taken at 0 minutes and 60 minutes. Samples were analyzed by UPLC-MS (Waters, Milford, MA) with compounds detected by selected ion recording (SIR) on a single quadrupole mass spectrometer.

## 6. Assay protocols

### Materials and Reagents

- DiI-HDL, custom purified HDL particles derived from human blood were prepared and labeled with 1,1'-dioctadecyl-3,3,3',3'- tetramethylindocarbocyanine perchlorate (DiI; Catalog No. D-282; Invitrogen, Carlsbad, CA). See section 5e) for details.
- Alexa 488 HDL, human HDL particles labeled with the Alexa Fluor<sup>®</sup> 488 Protein Labeling Kit (Catalog No. A-10235, Invitrogen; Carlsbad, CA) were purified and labeled by the Assay Provider.
- CellTiter-Glo<sup>®</sup> Luminescent Cell Viability Assay was purchased from Promega (Catalog No. G7573; Madison, WI).
- Radiolabeled cholesterol [1,2-<sup>3</sup>H(N)]-, 1 mCi (37 MBq) was obtained from PerkinElmer – NEN (Catalog No. NET139001MC; Waltham, MA).
- Alexa Fluor-594 conjugated human transferrin (Catalog No. T-13343) was obtained from Invitrogen.

## Cell Lines

The following cell lines were used in this study:

- ldlA[mSR-BI] is a Chinese hamster ovary (CHO) cell line that overexpresses murine SR-BI, isoform 1 (NP\_058021) and lacks the LDL receptor was obtained from the Assay Provider (Krieger Laboratory). This cell line was used for the primary assay and several secondary assays. A variant of this cell line expressing mutant SR-BI, where a cysteine required for interaction with BLT-1 is mutated to serine (C384S SR-BI), was used in several secondary assays.
- [ldlA7] is the parental cell line to ldlA[mSR-BI] cells, and does not overexpresses SR-BI, and can be used to rule out compound activity independent of SR-BI.

### a) DiI-HDL Uptake Assay

ldlA[mSR-BI] cells were plated into 384-well plates at 30  $\mu$ l per well and incubated overnight. As a measurable surrogate for cholesterol uptake, human HDL particles were treated with the lipophilic fluorescent dye DiI and exposed to ldlA[mSR-BI] cells in lipoprotein-free media (Ham's F12/0.5% fatty acid-free Bovine Serum Albumin [BSA]/25 mM HEPES pH 7.4 plus 10  $\mu$ g protein/ml DiI-HDL). Cells took up the DiI via SR-BI over 3 hours in the presence of compound. After significant uptake of the DiI, the cells became fluorescent. The level of fluorescence correlates with the amount of DiI uptake and can be measured with a standard plate reader. The uptake of lipid (represented by DiI) was inhibited by the compound BLT-1 or with an excess of HDL untreated with DiI.

The ldlA[mSR-BI] cells used in the assay were a CHO cell line lacking expression of the LDL receptors and overexpressing the Scavenger receptor (SR-BI). Inhibitors of SR-BI and HDL-mediated uptake lead to a reduction in fluorescence in this assay. Fluorescence was measured using a PerkinElmer EnVision plate reader. Primary HTS data were analyzed in Genedata Screener Assay Analyzer, and were normalized against DMSO and 1  $\mu$ M BLT-1 (positive control). For the HTS, the average of two replicates was used to rank order activity and to choose compounds for retests. For dose studies, the curves were generated with Genedata Condeseo and showed percent (%) activity for the individual doses.

### Detailed protocol

#### DiI-HDL Labeling Mix

2200 ml of Ham's/0.5% BSA/25 mM HEPES pH 7.4

DiI-HDL to 10  $\mu$ g protein/ml final concentration (Stocks vary from 2.81-4 mg/mL)

#### Ham's/0.5% BSA/25 mM HEPES Assay Media (1 liter)

5 g BSA powder (Sigma fatty acid-free)

1 Liter Ham's F12 base media  
25 ml 1 M HEPES pH 7.4

Id1A[mSR-BI] Chinese Hamster Ovary (CHO) cells were maintained in Ham's F12K (Cellgro Catalog No. 10-080-CV)/10% Fetal Calf Serum (Hyclone Catalog No. SH30071.03, Lot No. ATG32533)/ 1x Penicillinstreptomycin-L-Glutamine (Gibco Catalog No.10378-016)/200 ug/mL Geneticin (Gibco Catalog No.10131-027, Lot No.802967). Cells were fluid changed every 2 days and/or split upon reaching 80% confluency. For the primary HTS, cells were thawed at 6 million cells per Falcon T225 flask. After 2 days, the cells were passed to a Corning Hyperflask and plated after 3 days in the Hyperflask with a fluid change the day prior to plating.

On Day 0:

1. Plate 10,000 Id1A[mSR-BI] cells in 30 uL per well in Ham's F12K (Cellgro Catalog No. 10-080-CV)/5% Fetal Calf Serum (Hyclone Catalog No. SH30071.03, Lot No. ATG32533)/ 1x Penicillinstreptomycin-L-Glutamine (Gibco Catalog No. 10378-016) with a Thermo Combi Multi-drop fluid handler.

2. Use Aurora black 384-well, square, clear-bottomed, image-quality plates (Aurora Catalog No. 1022-11330) for the assay.

On Day 1:

1. Remove media with aspirator (Bio-Tek ELX405 plate washer).
2. Add 30 uL Ham's F12/0.5% Bovine Serum Albumin (fatty acid-free) /25 mM HEPES pH 7.4 (Invitrogen) + 10 ug protein/ml DiI-HDL with Thermo Combi fluid handler (slow speed setting).
3. Pin transfer 100 nL compounds and positive control (1 uM BLT-1). **It is recommended that low solubility compounds (such as ML278) be sonicated in DMSO to ensure complete dissolution prior to preparing stock solutions.**
4. Incubate 3 hours @ 37°C in humidified cell culture incubator.
5. Remove media with aspirator.
6. Wash twice with 30 uL PBS (+Ca and Mg) using the Thermo Combi on slow speed setting.
7. Analyze DiI-HDL uptake with Perkin-Elmer EnVision plate reader (Bodipy TMR mirror #405, excitation filter is Photometric 550 (#312) and emission filter is Cy3 595 (#229) with bottom read.

## **b) HDL Binding Assay**

HDL binding was assessed using Alexa Fluor 488-labeled HDL particles. For this assay, the Alexa 488 dye was covalently bound to apolipoprotein components of the HDL particle via primary amines; thus, no transfer of the fluorophore to cell membranes occurs. In this manner, direct binding of the HDL particles to SR-BI can be measured. As a positive control, BLT-1 was used at 1  $\mu$ M, which is known to increase binding of HDL to SR-BI. It is possible that a compound can reduce binding of HDL to the receptor, and this would lead to a decrease in signal. This assay is used to characterize the mechanism of action of a particular compound; therefore, any outcome in the assay is acceptable. Data were normalized against DMSO and BLT-1 (positive control) wells in Genedata Assay Analyzer. Curves were generated with Genedata Condeseo and showed percent (%) activity for the individual doses.

## Detailed protocol

ldlA[mSR-BI] Chinese Hamster Ovary (CHO) cells were maintained in Ham's F12K (Cellgro Catalog No. 10-080-CV)/10% Fetal Calf Serum (Hyclone Catalog No. SH30071.03, Lot No. ATG32533)/ 1x Penicillin-streptomycin-L-Glutamine (Gibco 10378-016)/200 ug/mL Geneticin (Gibco Catalog No.10131-027, Lot No.802967). Cells were fluid changed every 2 days and/or split upon reaching 80% confluency.

### On Day 0:

1. Plate 10,000 ldlA[mSR-BI] cells in 30 uL per well in Ham's F12K (Cellgro Catalog No. 10-080-CV)/5% Fetal Calf Serum (Hyclone Catalog No. SH30071.03, Lot No. ATG32533)/ 1x Penicillin-streptomycin-L-Glutamine (Gibco 10378-016).
2. Use Aurora black, 384-well, square, clear-bottomed image-quality plates (Aurora Catalog No.1022-11330) for the assay.

### On Day 1:

1. Remove media with aspirator (ELX405 plate washer).
2. Add 30 uL Ham's F12/0.5% Bovine Serum Albumin (fatty acid-free) (Sigma Catalog No. A8806-5G) /25 mM HEPES pH 7.4 (Invitrogen) plus 10 ug/mL Alexa 488-HDL with Thermo Combi fluid handler (slow speed setting).
3. Pin transfer 100 nL compounds and positive control (1 uM BLT-1).
4. Incubate 3 hours @ 37°C in a humidified cell culture incubator.
5. Remove media with aspirator.
6. Wash twice with 30 uL PBS (+Ca and Mg) using the Thermo Combi on slow speed setting.
7. Analyze Alexa-488-HDL binding with Perkin-Elmer EnVision plate reader (FITC mirror #403) with bottom read

## c) Cholesterol Ester Uptake Assay

The goal of this assay is to verify compounds that disrupt the binding of HDL particles to SR-BI scavenger receptor using an alternative means of labeling cholesteryl esters and avoiding any type of fluorescence measurement. To measure this binding event, HDL particles are loaded with [<sup>3</sup>H]cholesteryl oleate ester and added to mSR-BI cells. Cells take up HDL and the [<sup>3</sup>H]cholesteryl ester via the SR-BI scavenger receptor in 2 to 3 hours. After significant uptake of the HDL, the radiolabel can be detected by liquid scintillation counting. The level of radioactivity correlates with the amount of [<sup>3</sup>H]cholesteryl ester uptake. The uptake can be inhibited by the compound BLT-1 or when co-treated with an excess of unlabeled HDL. The ldlA[mSR-BI] cells utilized in the assay are a CHO cell line lacking expression of the LDL receptors and overexpressing the scavenger receptor, SR-BI. Inhibitors of SR-BI and HDL uptake will have a reduction in liquid scintillation counts.

## Detailed protocol

### On Day 0:

1. Plate 50,000 IdlA[mSR-BI] cells in 1 mL per well in Ham's F12K/5% Fetal Calf Serum/ 1x Penicillin-streptomycin-L-Glutamine/G418.

### On Day 2:

2. Wash cells with prewarmed (37°C) Ham's F12K medium plus 0.5% (wt/vol) fatty acid free BSA prior to adding radioactive lipoprotein.
3. Preincubate cells with 200 uL of inhibitors at indicated concentration or non-labeled HDL (at a 40 fold excess for measurement of non-specific activity) in Ham's F12/0.5% BSA/0.5%DMSO (vol/vol) for 1 hr at 37°C in a humidified cell culture incubator. **It is recommended that low solubility compounds (such as ML278) be sonicated in DMSO to ensure complete dissolution prior to preparing stock solutions.**
4. Add 50 uL Ham's F12/0.5% BSA/0.5%DMSO plus 50 ug/mL [<sup>3</sup>H]CE-HDL to reach a final concentration of 10 ug/mL and incubate 2 hours at 37°C in a humidified cell culture incubator
5. Remove the medium at the end of incubation at 4C
6. Wash the plates 2X with Tris-BSA buffer and 1X Tris-HCl buffer.
7. Add 1 ml isopropanol, and incubate for 20 min at 4C.
8. Collect 1 ml isopropanol/lysate into counting tube, add 4 ml liquid scintillation buffer, and prepare for counting.
9. Specific uptake is the difference between total and nonspecific activities.
10. Data were analyzed using Prism 6 (GraphPad Software).
11. All calculated errors represent standard errors of the mean.

## e) HDL isolation and labeling

Human HDL was isolated from donors by density gradient ultracentrifugation and labeled with [<sup>3</sup>H]cholesteryl ester ([<sup>3</sup>H]CE, [<sup>3</sup>H]CE-HDL) as described previously.<sup>2,3,4,5,6</sup>



## 7. References

---

- <sup>1</sup> Yu, M.; Romer, K. A.; Nieland, T. J. F.; Xu, S.; Saenz-Vash, V.; Penman, M.; Yesilaltay, A.; Carr, S. A.; Krieger, M. Exoplasmic cysteine Cys384 of the HDL receptor SR-BI is critical for its sensitivity to a small-molecule inhibitor and normal lipid transport activity. *Proc. Nat. Acad. Sci. USA* **2011**, *108*, 12243–12248.
- <sup>2</sup> Nieland, T. J. F.; Xu, S.; Penman, M.; Krieger, M. Negatively Cooperative Binding of High-Density Lipoprotein to the HDL Receptor SR-BI, *Biochemistry* **2011**, *50*, 1818–1830.
- <sup>3</sup> Chung, B. H.; Wilkinson, T.; Geer, J. C.; Segrest, J. P. Preparative and quantitative isolation of plasma lipoproteins: rapid, single discontinuous density gradient ultracentrifugation in a vertical rotor, *J Lipid Res.* **1980**, *21*, 284–291.
- <sup>4</sup> Patsch, J. R.; Patsch, W. Zonal ultracentrifugation. *Methods Enzymol.* **1986**, *129*, 3–26.
- <sup>5</sup> Goldstein, J. L.; Basu, S. K.; Brown, M. S. Receptor-mediated endocytosis of low-density lipoprotein in cultured cells. *Methods Enzymol.* **1983**, *98*, 241–260.
- <sup>6</sup> Gwynne, J. T.; Mahaffee, D. D. Rat adrenal uptake and metabolism of high density lipoprotein cholesteryl ester. *J. Biol. Chem.* **1989**, *264*, 8141–8150.

## 8. Off-target screening data for 17-11 (ML278)

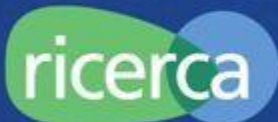

## Services Performed

LeadProfilingScreen (Total # of Assays: 67)

## Study Objectives

To evaluate, in LeadProfilingScreen, the activity of test compound BRD-K83634925-001-01-1 (Ricerca # 1162315).

## Study Signatures

---

A handwritten signature in black ink, appearing to read 'Hua-Chou Hsing', written in a cursive style.

---

Hua-Chou Hsing  
Study Director for Binding Assays

A handwritten signature in black ink, appearing to read 'Gonzalo Castillo', written in a cursive style.

---

Gonzalo Castillo, Ph.D.  
Technical Director

"This study was conducted according to the procedures described in this report. All data presented are authentic, accurate and correct to the best of our knowledge."

## Table of Contents

| Report Section                 | Page |
|--------------------------------|------|
| Cover Page                     | 1    |
| Study Signatures               | 2    |
| Table of Contents              | 3    |
| Summary                        | 4    |
| Summary of Significant Results | 5    |
| Experimental Results           | 6    |
| Methods                        | 9    |
| Reference Compounds            | 26   |
| Appendix                       | 28   |

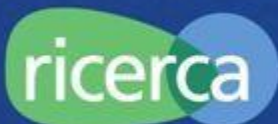

## Summary

### STUDY OBJECTIVE

To evaluate, in Radioligand Binding assays, the activity of compound BRD-K83634925-001-01-1 (BRD-9, PT# 1162315).

### METHODS

Methods employed in this study have been adapted from the scientific literature to maximize reliability and reproducibility. Reference standards were run as an integral part of each assay to ensure the validity of the results obtained. Assays were performed under conditions described in the accompanying "Methods" section of this report.

Where presented,  $IC_{50}$  values were determined by a non-linear, least squares regression analysis using MathIQ™ (ID Business Solutions Ltd., UK). Where inhibition constants ( $K_i$ ) are presented, the  $K_i$  values were calculated using the equation of Cheng and Prusoff (Cheng, Y., Prusoff, W.H., *Biochem. Pharmacol.* 22:3099-3108, 1973) using the observed  $IC_{50}$  of the tested compound, the concentration of radioligand employed in the assay, and the historical values for the  $K_D$  of the ligand (obtained experimentally at **Ricerca Biosciences, LLC**). Where presented, the Hill coefficient ( $n_H$ ), defining the slope of the competitive binding curve, was calculated using MathIQ™. Hill coefficients significantly different than 1.0, may suggest that the binding displacement does not follow the laws of mass action with a single binding site. Where  $IC_{50}$ ,  $K_i$ , and/or  $n_H$  data are presented without Standard Error of the Mean (SEM), data are insufficient to be quantitative, and the values presented ( $K_i$ ,  $IC_{50}$ ,  $n_H$ ) should be interpreted with caution.

### RESULTS

A summary of results meeting the significance criteria is presented in the following sections. Complete results are presented under the section labeled "Experimental Results". Individual responses, if requested, are presented in the section labeled "Individual Responses".

### SUMMARY/CONCLUSION

Significant results are displayed in the following table(s) in rank order of potency for estimated  $IC_{50}$  and/or  $K_i$  values.

## Summary of Significant Results

Biochemical assay results are presented as the percent inhibition of specific binding or activity throughout the report. All other results are expressed in terms of that assay's quantitation method.

- For primary assays, only the lowest concentration with a significant response judged by the assays' criteria, is shown in this summary.
- Where applicable, either the secondary assay results with the lowest dose/concentration meeting the significance criteria or, if inactive, the highest dose/concentration that did not meet the significance criteria is shown.
- Unless otherwise requested, primary screening in duplicate with quantitative data (e.g.,  $IC_{50} \pm SEM$ ,  $K_i \pm SEM$  and  $n_H$ ) are shown where applicable for individual requested assays. In screening packages, primary screening in duplicate with semi-quantitative data (e.g., estimated  $IC_{50}$ ,  $K_i$  and  $n_H$ ) are shown where applicable (concentration range of 4 log units); available secondary functional assays are carried out (30 mM) and MEC or MIC determined only if active in primary assays >50% at 1 log unit below initial test concentration.

Significant responses ( $\geq 50\%$  inhibition or stimulation for Biochemical assays) were noted in the primary assays listed below:

---

*No significant results noted.*

## Experimental Results

| Cat #                                                  | Assay Name                                 | Batch* | Spec. | Rep. | Conc. | % Inh. | IC <sub>50</sub> * | K <sub>i</sub> | n <sub>H</sub> | R |
|--------------------------------------------------------|--------------------------------------------|--------|-------|------|-------|--------|--------------------|----------------|----------------|---|
| <b>Compound: BRD-K83634925-001-01-1, PT #: 1162315</b> |                                            |        |       |      |       |        |                    |                |                |   |
| 200510                                                 | Adenosine A <sub>1</sub>                   | 317535 | hum   | 2    | 10 µM | 20     |                    |                |                |   |
| 200610                                                 | Adenosine A <sub>2A</sub>                  | 317540 | hum   | 2    | 10 µM | 24     |                    |                |                |   |
| 200720                                                 | Adenosine A <sub>3</sub>                   | 317577 | hum   | 2    | 10 µM | 43     |                    |                |                |   |
| 203100                                                 | Adrenergic α <sub>1A</sub>                 | 317536 | rat   | 2    | 10 µM | 3      |                    |                |                |   |
| 203200                                                 | Adrenergic α <sub>1B</sub>                 | 317547 | rat   | 2    | 10 µM | 13     |                    |                |                |   |
| 203400                                                 | Adrenergic α <sub>1D</sub>                 | 317537 | hum   | 2    | 10 µM | 5      |                    |                |                |   |
| 203620                                                 | Adrenergic α <sub>2A</sub>                 | 317534 | hum   | 2    | 10 µM | 2      |                    |                |                |   |
| 204010                                                 | Adrenergic β <sub>1</sub>                  | 317532 | hum   | 2    | 10 µM | 2      |                    |                |                |   |
| 204110                                                 | Adrenergic β <sub>2</sub>                  | 317533 | hum   | 2    | 10 µM | 4      |                    |                |                |   |
| 285010                                                 | Androgen (Testosterone) AR                 | 317485 | rat   | 2    | 10 µM | 21     |                    |                |                |   |
| 212510                                                 | Bradykinin B <sub>1</sub>                  | 317578 | hum   | 2    | 10 µM | -7     |                    |                |                |   |
| 212620                                                 | Bradykinin B <sub>2</sub>                  | 317579 | hum   | 2    | 10 µM | 3      |                    |                |                |   |
| 214510                                                 | Calcium Channel L-Type, Benzothiazepine    | 317482 | rat   | 2    | 10 µM | 16     |                    |                |                |   |
| 214600                                                 | Calcium Channel L-Type, Dihydropyridine    | 317531 | rat   | 2    | 10 µM | 20     |                    |                |                |   |
| 216000                                                 | Calcium Channel N-Type                     | 317580 | rat   | 2    | 10 µM | -17    |                    |                |                |   |
| 217030                                                 | Cannabinoid CB <sub>1</sub>                | 317529 | hum   | 2    | 10 µM | 8      |                    |                |                |   |
| 219500                                                 | Dopamine D <sub>1</sub>                    | 317541 | hum   | 2    | 10 µM | 6      |                    |                |                |   |
| 219700                                                 | Dopamine D <sub>2S</sub>                   | 317543 | hum   | 2    | 10 µM | -3     |                    |                |                |   |
| 219800                                                 | Dopamine D <sub>3</sub>                    | 317544 | hum   | 2    | 10 µM | 7      |                    |                |                |   |
| 219900                                                 | Dopamine D <sub>4.2</sub>                  | 317552 | hum   | 2    | 10 µM | -6     |                    |                |                |   |
| 224010                                                 | Endothelin ET <sub>A</sub>                 | 317641 | hum   | 2    | 10 µM | 12     |                    |                |                |   |
| 224110                                                 | Endothelin ET <sub>B</sub>                 | 317642 | hum   | 2    | 10 µM | 5      |                    |                |                |   |
| 225510                                                 | Epidermal Growth Factor (EGF)              | 317582 | hum   | 2    | 10 µM | 14     |                    |                |                |   |
| 226010                                                 | Estrogen ERα                               | 317583 | hum   | 2    | 10 µM | 6      |                    |                |                |   |
| 226600                                                 | GABA <sub>A</sub> , Flunitrazepam, Central | 317545 | rat   | 2    | 10 µM | -5     |                    |                |                |   |
| 226500                                                 | GABA <sub>A</sub> , Muscimol, Central      | 317556 | rat   | 2    | 10 µM | 8      |                    |                |                |   |
| 228610                                                 | GABA <sub>B1A</sub>                        | 317584 | hum   | 2    | 10 µM | -12    |                    |                |                |   |
| 232030                                                 | Glucocorticoid                             | 317476 | hum   | 2    | 10 µM | -24    |                    |                |                |   |
| 232700                                                 | Glutamate, Kainate                         | 317586 | rat   | 2    | 10 µM | 4      |                    |                |                |   |
| 232810                                                 | Glutamate, NMDA, Agonism                   | 317587 | rat   | 2    | 10 µM | -16    |                    |                |                |   |
| 232910                                                 | Glutamate, NMDA, Glycine                   | 317588 | rat   | 2    | 10 µM | -1     |                    |                |                |   |
| 233000                                                 | Glutamate, NMDA, Phencyclidine             | 317557 | rat   | 2    | 10 µM | 1      |                    |                |                |   |
| 239610                                                 | Histamine H <sub>1</sub>                   | 317546 | hum   | 2    | 10 µM | 9      |                    |                |                |   |
| 239710                                                 | Histamine H <sub>2</sub>                   | 317514 | hum   | 2    | 10 µM | 8      |                    |                |                |   |

Note: Items meeting criteria for significance (≥50% stimulation or inhibition) are highlighted.

\* Batch: Represents compounds tested concurrently in the same assay(s).

ham=Hamster; hum=Human

Broad Institute

Study #: AB13141, Quote #: 30266-1, Compound Code: BRD-K83634925-001-01-1 (1162315)

Tuesday, June 26, 2012

Page 6 of 28

## Experimental Results

| Cat #  | Assay Name                                            | Batch* | Spec.  | Rep. | Conc. | % Inh. | IC <sub>50</sub> * | K <sub>i</sub> | n <sub>H</sub> | R |
|--------|-------------------------------------------------------|--------|--------|------|-------|--------|--------------------|----------------|----------------|---|
| 239820 | Histamine H <sub>3</sub>                              | 317553 | hum    | 2    | 10 µM | 0      |                    |                |                |   |
| 241000 | Imidazoline I <sub>2</sub> , Central                  | 317539 | rat    | 2    | 10 µM | 15     |                    |                |                |   |
| 243520 | Interleukin IL-1                                      | 317484 | mouse  | 2    | 10 µM | -10    |                    |                |                |   |
| 250460 | Leukotriene, Cysteinyl CysLT <sub>1</sub>             | 317589 | hum    | 2    | 10 µM | -6     |                    |                |                |   |
| 251600 | Melatonin MT <sub>1</sub>                             | 317513 | hum    | 2    | 10 µM | -3     |                    |                |                |   |
| 252610 | Muscarinic M <sub>1</sub>                             | 317554 | hum    | 2    | 10 µM | 11     |                    |                |                |   |
| 252710 | Muscarinic M <sub>2</sub>                             | 317527 | hum    | 2    | 10 µM | -9     |                    |                |                |   |
| 252810 | Muscarinic M <sub>3</sub>                             | 317528 | hum    | 2    | 10 µM | 0      |                    |                |                |   |
| 257010 | Neuropeptide Y Y <sub>1</sub>                         | 317468 | hum    | 2    | 10 µM | -8     |                    |                |                |   |
| 257110 | Neuropeptide Y Y <sub>2</sub>                         | 317592 | hum    | 2    | 10 µM | -1     |                    |                |                |   |
| 258590 | Nicotinic Acetylcholine                               | 317521 | hum    | 2    | 10 µM | 0      |                    |                |                |   |
| 258700 | Nicotinic Acetylcholine α <sub>1</sub> , Bungarotoxin | 317522 | hum    | 2    | 10 µM | -3     |                    |                |                |   |
| 260130 | Opiate δ <sub>1</sub> (OP1, DOP)                      | 317525 | hum    | 2    | 10 µM | -8     |                    |                |                |   |
| 260210 | Opiate κ(OP2, KOP)                                    | 317524 | hum    | 2    | 10 µM | 2      |                    |                |                |   |
| 260410 | Opiate μ(OP3, MOP)                                    | 317526 | hum    | 2    | 10 µM | -15    |                    |                |                |   |
| 264500 | Phorbol Ester                                         | 317558 | mouse  | 2    | 10 µM | -4     |                    |                |                |   |
| 265010 | Platelet Activating Factor (PAF)                      | 317496 | hum    | 2    | 10 µM | 23     |                    |                |                |   |
| 265600 | Potassium Channel [K <sub>ATP</sub> ]                 | 317559 | ham    | 2    | 10 µM | -1     |                    |                |                |   |
| 265900 | Potassium Channel hERG                                | 317560 | hum    | 2    | 10 µM | -4     |                    |                |                |   |
| 268420 | Prostanoid EP <sub>4</sub>                            | 317561 | hum    | 2    | 10 µM | 2      |                    |                |                |   |
| 268700 | Purinergic P <sub>2X</sub>                            | 317590 | rabbit | 2    | 10 µM | 7      |                    |                |                |   |
| 268810 | Purinergic P <sub>2Y</sub>                            | 317591 | rat    | 2    | 10 µM | 9      |                    |                |                |   |
| 270000 | Rolipram                                              | 317562 | rat    | 2    | 10 µM | 8      |                    |                |                |   |
| 271110 | Serotonin (5-Hydroxytryptamine) 5-HT <sub>1A</sub>    | 317510 | hum    | 2    | 10 µM | 0      |                    |                |                |   |
| 271700 | Serotonin (5-Hydroxytryptamine) 5-HT <sub>2B</sub>    | 317551 | hum    | 2    | 10 µM | 24     |                    |                |                |   |
| 271910 | Serotonin (5-Hydroxytryptamine) 5-HT <sub>3</sub>     | 317593 | hum    | 2    | 10 µM | 22     |                    |                |                |   |
| 278110 | Sigma σ <sub>1</sub>                                  | 317523 | hum    | 2    | 10 µM | -20    |                    |                |                |   |
| 255520 | Tachykinin NK <sub>1</sub>                            | 317474 | hum    | 2    | 10 µM | 7      |                    |                |                |   |
| 285900 | Thyroid Hormone                                       | 317488 | rat    | 2    | 10 µM | 10     |                    |                |                |   |
| 220320 | Transporter, Dopamine (DAT)                           | 317469 | hum    | 2    | 10 µM | -1     |                    |                |                |   |
| 226400 | Transporter, GABA                                     | 317538 | rat    | 2    | 10 µM | 32     |                    |                |                |   |
| 204410 | Transporter, Norepinephrine (NET)                     | 317520 | hum    | 2    | 10 µM | 4      |                    |                |                |   |
| 274030 | Transporter, Serotonin (5-Hydroxytryptamine) (SERT)   | 317549 | hum    | 2    | 10 µM | 9      |                    |                |                |   |

Note: Items meeting criteria for significance (≥50% stimulation or inhibition) are highlighted.

\* Batch: Represents compounds tested concurrently in the same assay(s).

ham=Hamster; hum=Human

Broad Institute

Study #: AB13141, Quote #: 30266-1, Compound Code: BRD-K83634925-001-01-1 (1162315)

Tuesday, June 26, 2012

Page 7 of 28

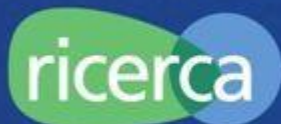

## Experimental Results

MDS has an exclusive, worldwide limited use license from Synaptic Pharmaceutical Corporation to perform these assays: Adrenergic Alpha 1D, Adrenergic Alpha 2B, and Dopamine D5 for safety and selectivity profiling. MDS' license excludes performing those assays in connection with drug discovery or development activities where the principal therapeutic mechanism of action of the test compound involves selective binding to a licensed receptor. Customers may contact Synaptic directly if they believe they need a broader license.

---

Note: Items meeting criteria for significance ( $\geq 50\%$  stimulation or inhibition) are highlighted.

\* Batch: Represents compounds tested concurrently in the same assay(s).

ham=Hamster; hum=Human

---

Broad Institute

Study #: AB13141, Quote #: 30266-1, Compound Code: BRD-K83634925-001-01-1 (1162315)

Tuesday, June 26, 2012

Page 8 of 28



## Methods

### ■ 200510 Adenosine A<sub>1</sub>

|                              |                                                            |                               |                                       |
|------------------------------|------------------------------------------------------------|-------------------------------|---------------------------------------|
| <b>Source:</b>               | Human recombinant CHO cells                                | <b>Ligand:</b>                | 1.0 nM [ <sup>3</sup> H] DPCPX        |
| <b>Vehicle:</b>              | 1% DMSO                                                    | <b>Non-Specific Ligand:</b>   | 100 μM R(-)-PIA                       |
| <b>Incubation Time/Temp:</b> | 90 minutes @ 25°C                                          | <b>Specific Binding:</b>      | 85% *                                 |
| <b>Incubation Buffer:</b>    | 20 mM HEPES, pH 7.4, 10 mM MgCl <sub>2</sub> , 100 mM NaCl | <b>Quantitation Method:</b>   | Radioligand Binding                   |
| <b>Kd:</b>                   | 1.40 nM *                                                  | <b>Significance Criteria:</b> | ≥50% of max stimulation or inhibition |
|                              |                                                            | <b>Bmax:</b>                  | 2.70 pmole/mg Protein *               |

### ■ 200610 Adenosine A<sub>2A</sub>

|                              |                                                                                         |                               |                                       |
|------------------------------|-----------------------------------------------------------------------------------------|-------------------------------|---------------------------------------|
| <b>Source:</b>               | Human recombinant HEK-293 cells                                                         | <b>Ligand:</b>                | 0.050 μM [ <sup>3</sup> H] CGS-21680  |
| <b>Vehicle:</b>              | 1% DMSO                                                                                 | <b>Non-Specific Ligand:</b>   | 50.0 μM NECA                          |
| <b>Incubation Time/Temp:</b> | 90 minutes @ 25°C                                                                       | <b>Specific Binding:</b>      | 85% *                                 |
| <b>Incubation Buffer:</b>    | 50 mM Tris-HCl, pH 7.4, 10 mM MgCl <sub>2</sub> , 1 mM EDTA, 2 U/mL Adenosine Deaminase | <b>Quantitation Method:</b>   | Radioligand Binding                   |
| <b>Kd:</b>                   | 0.064 μM *                                                                              | <b>Significance Criteria:</b> | ≥50% of max stimulation or inhibition |
|                              |                                                                                         | <b>Bmax:</b>                  | 7.0 pmole/mg Protein *                |

### ■ 200720 Adenosine A<sub>3</sub>

|                              |                                                                                 |                               |                                       |
|------------------------------|---------------------------------------------------------------------------------|-------------------------------|---------------------------------------|
| <b>Source:</b>               | Human recombinant CHO-K1 cells                                                  | <b>Ligand:</b>                | 0.50 nM [ <sup>125</sup> I] AB-MECA   |
| <b>Vehicle:</b>              | 1% DMSO                                                                         | <b>Non-Specific Ligand:</b>   | 1.0 μM IB-MECA                        |
| <b>Incubation Time/Temp:</b> | 60 minutes @ 25°C                                                               | <b>Specific Binding:</b>      | 83% *                                 |
| <b>Incubation Buffer:</b>    | 25 mM HEPES, pH 7.4, 5 mM MgCl <sub>2</sub> , 1 mM CaCl <sub>2</sub> , 0.1% BSA | <b>Quantitation Method:</b>   | Radioligand Binding                   |
| <b>Kd:</b>                   | 5.90 nM *                                                                       | <b>Significance Criteria:</b> | ≥50% of max stimulation or inhibition |
|                              |                                                                                 | <b>Bmax:</b>                  | 1.80 pmole/mg Protein *               |

### ■ 203100 Adrenergic α<sub>1A</sub>

|                              |                                     |                               |                                       |
|------------------------------|-------------------------------------|-------------------------------|---------------------------------------|
| <b>Source:</b>               | Wistar Rat submaxillary gland       | <b>Ligand:</b>                | 0.25 nM [ <sup>3</sup> H] Prazosin    |
| <b>Vehicle:</b>              | 1% DMSO                             | <b>Non-Specific Ligand:</b>   | 10.0 μM Phentolamine                  |
| <b>Incubation Time/Temp:</b> | 60 minutes @ 25°C                   | <b>Specific Binding:</b>      | 90% *                                 |
| <b>Incubation Buffer:</b>    | 50 mM Tris-HCl, pH 7.4, 0.5 mM EDTA | <b>Quantitation Method:</b>   | Radioligand Binding                   |
| <b>Kd:</b>                   | 0.17 nM *                           | <b>Significance Criteria:</b> | ≥50% of max stimulation or inhibition |
|                              |                                     | <b>Bmax:</b>                  | 0.18 pmole/mg Protein *               |

\* Historical Values

Broad Institute

Study #: AB13141, Quote #: 30266-1, Compound Code: BRD-K83634925-001-01-1 (1162315)

Tuesday, June 26, 2012

Page 9 of 28

## Methods

### ■ 203200 Adrenergic $\alpha_{1B}$

|                              |                                     |                               |                                             |
|------------------------------|-------------------------------------|-------------------------------|---------------------------------------------|
| <b>Source:</b>               | Wistar Rat liver                    | <b>Ligand:</b>                | 0.25 nM [ <sup>3</sup> H] Prazosin          |
| <b>Vehicle:</b>              | 1% DMSO                             | <b>Non-Specific Ligand:</b>   | 10.0 $\mu$ M Phentolamine                   |
| <b>Incubation Time/Temp:</b> | 60 minutes @ 25°C                   | <b>Specific Binding:</b>      | 90% *                                       |
| <b>Incubation Buffer:</b>    | 50 mM Tris-HCl, pH 7.4, 0.5 mM EDTA | <b>Quantitation Method:</b>   | Radioligand Binding                         |
| <b>Kd:</b>                   | 0.31 nM *                           | <b>Significance Criteria:</b> | $\geq$ 50% of max stimulation or inhibition |
|                              |                                     | <b>Bmax:</b>                  | 0.18 pmole/mg Protein *                     |

### ■ 203400 Adrenergic $\alpha_{1D}$

|                              |                                 |                               |                                             |
|------------------------------|---------------------------------|-------------------------------|---------------------------------------------|
| <b>Source:</b>               | Human recombinant HEK-293 cells | <b>Ligand:</b>                | 0.60 nM [ <sup>3</sup> H] Prazosin          |
| <b>Vehicle:</b>              | 1% DMSO                         | <b>Non-Specific Ligand:</b>   | 10.0 $\mu$ M Phentolamine                   |
| <b>Incubation Time/Temp:</b> | 60 minutes @ 25°C               | <b>Specific Binding:</b>      | 80% *                                       |
| <b>Incubation Buffer:</b>    | 50 mM Tris-HCl, pH 7.4          | <b>Quantitation Method:</b>   | Radioligand Binding                         |
| <b>Kd:</b>                   | 0.58 nM *                       | <b>Significance Criteria:</b> | $\geq$ 50% of max stimulation or inhibition |
|                              |                                 | <b>Bmax:</b>                  | 0.17 pmole/mg Protein *                     |

### ■ 203620 Adrenergic $\alpha_{2A}$

|                              |                                                               |                               |                                             |
|------------------------------|---------------------------------------------------------------|-------------------------------|---------------------------------------------|
| <b>Source:</b>               | Human recombinant insect Sf9 cells                            | <b>Ligand:</b>                | 1.0 nM [ <sup>3</sup> H] MK-912             |
| <b>Vehicle:</b>              | 1% DMSO                                                       | <b>Non-Specific Ligand:</b>   | 10.0 $\mu$ M WB-4101                        |
| <b>Incubation Time/Temp:</b> | 60 minutes @ 25°C                                             | <b>Specific Binding:</b>      | 95% *                                       |
| <b>Incubation Buffer:</b>    | 50 mM Tris-HCl, pH 7.4, 12.5 mM MgCl <sub>2</sub> , 2 mM EDTA | <b>Quantitation Method:</b>   | Radioligand Binding                         |
| <b>Kd:</b>                   | 0.60 nM *                                                     | <b>Significance Criteria:</b> | $\geq$ 50% of max stimulation or inhibition |
|                              |                                                               | <b>Bmax:</b>                  | 4.60 pmole/mg Protein *                     |

### ■ 204010 Adrenergic $\beta_1$

|                              |                                                                                                             |                               |                                             |
|------------------------------|-------------------------------------------------------------------------------------------------------------|-------------------------------|---------------------------------------------|
| <b>Source:</b>               | Human recombinant CHO-K1 cells                                                                              | <b>Ligand:</b>                | 0.030 nM [ <sup>125</sup> I] Cyanopindolol  |
| <b>Vehicle:</b>              | 1% DMSO                                                                                                     | <b>Non-Specific Ligand:</b>   | 100 $\mu$ M S(-)-Propranolol                |
| <b>Incubation Time/Temp:</b> | 2 hours @ 25°C                                                                                              | <b>Specific Binding:</b>      | 95% *                                       |
| <b>Incubation Buffer:</b>    | 50 mM Tris-HCl, pH 7.4, 1.4 mM Ascorbic Acid, 0.001% BSA, 5 mM EDTA, 1.5 mM CaCl <sub>2</sub> , 120 mM NaCl | <b>Quantitation Method:</b>   | Radioligand Binding                         |
| <b>Kd:</b>                   | 0.041 nM *                                                                                                  | <b>Significance Criteria:</b> | $\geq$ 50% of max stimulation or inhibition |
|                              |                                                                                                             | <b>Bmax:</b>                  | 0.072 pmole/mg Protein *                    |

\* Historical Values

Broad Institute

Study #: AB13141, Quote #: 30266-1, Compound Code: BRD-K83634925-001-01-1 (1162315)

Tuesday, June 26, 2012

Page 10 of 28

## Methods

### ■ 204110 Adrenergic $\beta_2$

|                              |                                                                             |                               |                                             |
|------------------------------|-----------------------------------------------------------------------------|-------------------------------|---------------------------------------------|
| <b>Source:</b>               | Human recombinant CHO cells                                                 | <b>Ligand:</b>                | 0.20 nM [ $^3$ H] CGP-12177                 |
| <b>Vehicle:</b>              | 1% DMSO                                                                     | <b>Non-Specific Ligand:</b>   | 10.0 $\mu$ M ICI-118551                     |
| <b>Incubation Time/Temp:</b> | 60 minutes @ 25°C                                                           | <b>Specific Binding:</b>      | 95% *                                       |
| <b>Incubation Buffer:</b>    | 50 mM Tris-HCl, pH 7.4, 0.5 mM EDTA, 5.0 mM MgCl <sub>2</sub> , 120 mM NaCl | <b>Quantitation Method:</b>   | Radioligand Binding                         |
| <b>Kd:</b>                   | 0.44 nM *                                                                   | <b>Significance Criteria:</b> | $\geq$ 50% of max stimulation or inhibition |
|                              |                                                                             | <b>Bmax:</b>                  | 0.44 pmole/mg Protein *                     |

### ■ 285010 Androgen (Testosterone) AR

|                              |                                                                                          |                               |                                             |
|------------------------------|------------------------------------------------------------------------------------------|-------------------------------|---------------------------------------------|
| <b>Source:</b>               | Rat recombinant E. coli                                                                  | <b>Ligand:</b>                | 1.50 nM [ $^3$ H] Mibolerone                |
| <b>Vehicle:</b>              | 1% DMSO                                                                                  | <b>Non-Specific Ligand:</b>   | 10.0 $\mu$ M Mibolerone                     |
| <b>Incubation Time/Temp:</b> | 4 hours @ 4°C                                                                            | <b>Specific Binding:</b>      | 90% *                                       |
| <b>Incubation Buffer:</b>    | 50 mM Tris-HCl, pH 7.4, 0.8 M NaCl, 10% Glycerol, 2 mM Dithiothreitol, 0.1% BSA, 2% EtOH | <b>Quantitation Method:</b>   | Radioligand Binding                         |
| <b>Kd:</b>                   | 3.0 nM *                                                                                 | <b>Significance Criteria:</b> | $\geq$ 50% of max stimulation or inhibition |
|                              |                                                                                          | <b>Bmax:</b>                  | 930 pmole/mg Protein *                      |

### ■ 212510 Bradykinin B<sub>1</sub>

|                              |                                                                                                                 |                               |                                                                    |
|------------------------------|-----------------------------------------------------------------------------------------------------------------|-------------------------------|--------------------------------------------------------------------|
| <b>Source:</b>               | Human IMR-90 cells                                                                                              | <b>Ligand:</b>                | 0.50 nM [ $^3$ H] (Des-Arg <sup>10</sup> )-Kallidin                |
| <b>Vehicle:</b>              | 1% DMSO                                                                                                         | <b>Non-Specific Ligand:</b>   | 10.0 $\mu$ M (Des-Arg <sup>9</sup> , Leu <sup>8</sup> )-Bradykinin |
| <b>Incubation Time/Temp:</b> | 60 minutes @ 25°C                                                                                               | <b>Specific Binding:</b>      | 80% *                                                              |
| <b>Incubation Buffer:</b>    | 20 mM HEPES, pH 7.4, 125 mM N-Methyl-D-glucamine, 5 mM KCl, 1 mM 1,10-Phenanthroline, 140 $\mu$ g/ml Bacitracin | <b>Quantitation Method:</b>   | Radioligand Binding                                                |
| <b>Kd:</b>                   | 0.17 nM *                                                                                                       | <b>Significance Criteria:</b> | $\geq$ 50% of max stimulation or inhibition                        |
|                              |                                                                                                                 | <b>Bmax:</b>                  | 0.55 pmole/mg Protein *                                            |

### ■ 212620 Bradykinin B<sub>2</sub>

|                              |                                                                                |                               |                                             |
|------------------------------|--------------------------------------------------------------------------------|-------------------------------|---------------------------------------------|
| <b>Source:</b>               | Human recombinant Chem-1 cells                                                 | <b>Ligand:</b>                | 0.50 nM [ $^3$ H] Bradykinin                |
| <b>Vehicle:</b>              | 1% DMSO                                                                        | <b>Non-Specific Ligand:</b>   | 5.0 $\mu$ M Bradykinin                      |
| <b>Incubation Time/Temp:</b> | 60 minutes @ 25°C                                                              | <b>Specific Binding:</b>      | 90% *                                       |
| <b>Incubation Buffer:</b>    | 50 mM HEPES, pH 7.4, 0.2% BSA, 1 mM CaCl <sub>2</sub> , 5 mM MgCl <sub>2</sub> | <b>Quantitation Method:</b>   | Radioligand Binding                         |
| <b>Kd:</b>                   | 0.85 nM *                                                                      | <b>Significance Criteria:</b> | $\geq$ 50% of max stimulation or inhibition |
|                              |                                                                                | <b>Bmax:</b>                  | 9.40 pmole/mg Protein *                     |

\* Historical Values

Broad Institute

Study #: AB13141, Quote #: 30266-1, Compound Code: BRD-K83634925-001-01-1 (1162315)

Tuesday, June 26, 2012

Page 11 of 28

## Methods

### ■ 214510 Calcium Channel L-Type, Benzothiazepine

|                              |                                  |                               |                                       |
|------------------------------|----------------------------------|-------------------------------|---------------------------------------|
| <b>Source:</b>               | Wistar Rat brain                 | <b>Ligand:</b>                | 2.0 nM [ <sup>3</sup> H] Diltiazem    |
| <b>Vehicle:</b>              | 1% DMSO                          | <b>Non-Specific Ligand:</b>   | 10.0 μM Diltiazem                     |
| <b>Incubation Time/Temp:</b> | 3 hours @ 4°C                    | <b>Specific Binding:</b>      | 73% *                                 |
| <b>Incubation Buffer:</b>    | 50 mM Tris-HCl, pH 7.4, 0.1% BSA | <b>Quantitation Method:</b>   | Radioligand Binding                   |
| <b>Kd:</b>                   | 0.016 μM *                       | <b>Significance Criteria:</b> | ≥50% of max stimulation or inhibition |
|                              |                                  | <b>Bmax:</b>                  | 0.21 pmole/mg Protein *               |

### ■ 214600 Calcium Channel L-Type, Dihydropyridine

|                              |                            |                               |                                        |
|------------------------------|----------------------------|-------------------------------|----------------------------------------|
| <b>Source:</b>               | Wistar Rat cerebral cortex | <b>Ligand:</b>                | 0.10 nM [ <sup>3</sup> H] Nitrendipine |
| <b>Vehicle:</b>              | 1% DMSO                    | <b>Non-Specific Ligand:</b>   | 1.0 μM Nifedipine                      |
| <b>Incubation Time/Temp:</b> | 90 minutes @ 25°C          | <b>Specific Binding:</b>      | 91% *                                  |
| <b>Incubation Buffer:</b>    | 50 mM Tris-HCl, pH 7.4     | <b>Quantitation Method:</b>   | Radioligand Binding                    |
| <b>Kd:</b>                   | 0.18 nM *                  | <b>Significance Criteria:</b> | ≥50% of max stimulation or inhibition  |
|                              |                            | <b>Bmax:</b>                  | 0.23 pmole/mg Protein *                |

### ■ 216000 Calcium Channel N-Type

|                              |                                  |                               |                                            |
|------------------------------|----------------------------------|-------------------------------|--------------------------------------------|
| <b>Source:</b>               | Wistar Rat frontal brain         | <b>Ligand:</b>                | 10 pM [ <sup>125</sup> I] ω-Conotoxin GVIA |
| <b>Vehicle:</b>              | 1% DMSO                          | <b>Non-Specific Ligand:</b>   | 0.10 μM ω-Conotoxin GVIA                   |
| <b>Incubation Time/Temp:</b> | 30 minutes @ 4°C                 | <b>Specific Binding:</b>      | 96% *                                      |
| <b>Incubation Buffer:</b>    | 20 mM Tris-HCl, pH 7.4, 0.5% BSA | <b>Quantitation Method:</b>   | Radioligand Binding                        |
| <b>Kd:</b>                   | 0.051 nM *                       | <b>Significance Criteria:</b> | ≥50% of max stimulation or inhibition      |
|                              |                                  | <b>Bmax:</b>                  | 0.88 pmole/mg Protein *                    |

### ■ 217030 Cannabinoid CB<sub>1</sub>

|                              |                                                                                    |                               |                                       |
|------------------------------|------------------------------------------------------------------------------------|-------------------------------|---------------------------------------|
| <b>Source:</b>               | Human recombinant Chem-1 cells                                                     | <b>Ligand:</b>                | 2.0 nM [ <sup>3</sup> H] SR141716A    |
| <b>Vehicle:</b>              | 1% DMSO                                                                            | <b>Non-Specific Ligand:</b>   | 10.0 μM R(+)-WIN-55,212-2             |
| <b>Incubation Time/Temp:</b> | 90 minutes @ 37°C                                                                  | <b>Specific Binding:</b>      | 70% *                                 |
| <b>Incubation Buffer:</b>    | 50 mM HEPES, pH 7.4, 5 mM MgCl <sub>2</sub> ,<br>1 mM CaCl <sub>2</sub> , 0.2% BSA | <b>Quantitation Method:</b>   | Radioligand Binding                   |
| <b>Kd:</b>                   | 5.90 nM *                                                                          | <b>Significance Criteria:</b> | ≥50% of max stimulation or inhibition |
|                              |                                                                                    | <b>Bmax:</b>                  | 15.0 pmole/mg Protein *               |

\* Historical Values

Broad Institute

Study #: AB13141, Quote #: 30266-1, Compound Code: BRD-K83634925-001-01-1 (1162315)

Tuesday, June 26, 2012

Page 12 of 28

## Methods

### ■ 219500 Dopamine D<sub>1</sub>

|                              |                                                                       |                               |                                       |
|------------------------------|-----------------------------------------------------------------------|-------------------------------|---------------------------------------|
| <b>Source:</b>               | Human recombinant CHO cells                                           | <b>Ligand:</b>                | 1.40 nM [ <sup>3</sup> H] SCH-23390   |
| <b>Vehicle:</b>              | 1% DMSO                                                               | <b>Non-Specific Ligand:</b>   | 10.0 μM (+)-Butaclamol                |
| <b>Incubation Time/Temp:</b> | 2 hours @ 37°C                                                        | <b>Specific Binding:</b>      | 90% *                                 |
| <b>Incubation Buffer:</b>    | 50 mM Tris-HCl, pH 7.4, 1.4 mM Ascorbic Acid, 0.001% BSA, 150 mM NaCl | <b>Quantitation Method:</b>   | Radioligand Binding                   |
| <b>Kd:</b>                   | 1.40 nM *                                                             | <b>Significance Criteria:</b> | ≥50% of max stimulation or inhibition |
|                              |                                                                       | <b>Bmax:</b>                  | 0.63 pmole/mg Protein *               |

### ■ 219700 Dopamine D<sub>2s</sub>

|                              |                                                                       |                               |                                       |
|------------------------------|-----------------------------------------------------------------------|-------------------------------|---------------------------------------|
| <b>Source:</b>               | Human recombinant CHO cells                                           | <b>Ligand:</b>                | 0.16 nM [ <sup>3</sup> H] Spiperone   |
| <b>Vehicle:</b>              | 1% DMSO                                                               | <b>Non-Specific Ligand:</b>   | 10.0 μM Haloperidol                   |
| <b>Incubation Time/Temp:</b> | 2 hours @ 25°C                                                        | <b>Specific Binding:</b>      | 90% *                                 |
| <b>Incubation Buffer:</b>    | 50 mM Tris-HCl, pH 7.4, 1.4 mM Ascorbic Acid, 0.001% BSA, 150 mM NaCl | <b>Quantitation Method:</b>   | Radioligand Binding                   |
| <b>Kd:</b>                   | 0.090 nM *                                                            | <b>Significance Criteria:</b> | ≥50% of max stimulation or inhibition |
|                              |                                                                       | <b>Bmax:</b>                  | 1.60 pmole/mg Protein *               |

### ■ 219800 Dopamine D<sub>3</sub>

|                              |                                                                       |                               |                                       |
|------------------------------|-----------------------------------------------------------------------|-------------------------------|---------------------------------------|
| <b>Source:</b>               | Human recombinant CHO cells                                           | <b>Ligand:</b>                | 0.70 nM [ <sup>3</sup> H] Spiperone   |
| <b>Vehicle:</b>              | 1% DMSO                                                               | <b>Non-Specific Ligand:</b>   | 25.0 μM S(-)-Sulpiride                |
| <b>Incubation Time/Temp:</b> | 2 hours @ 37°C                                                        | <b>Specific Binding:</b>      | 85% *                                 |
| <b>Incubation Buffer:</b>    | 50 mM Tris-HCl, pH 7.4, 1.4 mM Ascorbic Acid, 0.001% BSA, 150 mM NaCl | <b>Quantitation Method:</b>   | Radioligand Binding                   |
| <b>Kd:</b>                   | 0.36 nM *                                                             | <b>Significance Criteria:</b> | ≥50% of max stimulation or inhibition |
|                              |                                                                       | <b>Bmax:</b>                  | 1.10 pmole/mg Protein *               |

### ■ 219900 Dopamine D<sub>4.2</sub>

|                              |                                                                       |                               |                                       |
|------------------------------|-----------------------------------------------------------------------|-------------------------------|---------------------------------------|
| <b>Source:</b>               | Human recombinant CHO-K1 cells                                        | <b>Ligand:</b>                | 0.50 nM [ <sup>3</sup> H] Spiperone   |
| <b>Vehicle:</b>              | 1% DMSO                                                               | <b>Non-Specific Ligand:</b>   | 10.0 μM Haloperidol                   |
| <b>Incubation Time/Temp:</b> | 2 hours @ 25°C                                                        | <b>Specific Binding:</b>      | 90% *                                 |
| <b>Incubation Buffer:</b>    | 50 mM Tris-HCl, pH 7.4, 1.4 mM Ascorbic Acid, 0.001% BSA, 150 mM NaCl | <b>Quantitation Method:</b>   | Radioligand Binding                   |
| <b>Kd:</b>                   | 0.32 nM *                                                             | <b>Significance Criteria:</b> | ≥50% of max stimulation or inhibition |
|                              |                                                                       | <b>Bmax:</b>                  | 0.55 pmole/mg Protein *               |

\* Historical Values

Broad Institute

Study #: AB13141, Quote #: 30266-1, Compound Code: BRD-K83634925-001-01-1 (1162315)

Tuesday, June 26, 2012

Page 13 of 28

## Methods

### ■ 224010 Endothelin ET<sub>A</sub>

|                              |                                                                             |                               |                                           |
|------------------------------|-----------------------------------------------------------------------------|-------------------------------|-------------------------------------------|
| <b>Source:</b>               | Human recombinant CHO-K1 cells                                              | <b>Ligand:</b>                | 0.030 nM [ <sup>125</sup> I] Endothelin-1 |
| <b>Vehicle:</b>              | 1% DMSO                                                                     | <b>Non-Specific Ligand:</b>   | 0.10 μM Endothelin-1                      |
| <b>Incubation Time/Temp:</b> | 2 hours @ 37°C                                                              | <b>Specific Binding:</b>      | 90% *                                     |
| <b>Incubation Buffer:</b>    | 50 mM Tris-HCl, pH 7.4, 0.1% BSA, 0.5 mM CaCl <sub>2</sub> , 0.05% Tween-20 | <b>Quantitation Method:</b>   | Radioligand Binding                       |
| <b>Kd:</b>                   | 0.048 nM *                                                                  | <b>Significance Criteria:</b> | ≥50% of max stimulation or inhibition     |
|                              |                                                                             | <b>Bmax:</b>                  | 0.35 pmole/mg Protein *                   |

### ■ 224110 Endothelin ET<sub>B</sub>

|                              |                                                                                 |                               |                                          |
|------------------------------|---------------------------------------------------------------------------------|-------------------------------|------------------------------------------|
| <b>Source:</b>               | Human recombinant CHO-K1 cells                                                  | <b>Ligand:</b>                | 0.10 nM [ <sup>125</sup> I] Endothelin-1 |
| <b>Vehicle:</b>              | 1% DMSO                                                                         | <b>Non-Specific Ligand:</b>   | 0.10 μM Endothelin-1                     |
| <b>Incubation Time/Temp:</b> | 2 hours @ 25°C                                                                  | <b>Specific Binding:</b>      | 75% *                                    |
| <b>Incubation Buffer:</b>    | 50 mM HEPES, pH 7.4, 1 mM CaCl <sub>2</sub> , 5 mM MgCl <sub>2</sub> , 0.5% BSA | <b>Quantitation Method:</b>   | Radioligand Binding                      |
| <b>Kd:</b>                   | 0.085 nM *                                                                      | <b>Significance Criteria:</b> | ≥50% of max stimulation or inhibition    |
|                              |                                                                                 | <b>Bmax:</b>                  | 4.30 pmole/mg Protein *                  |

### ■ 225510 Epidermal Growth Factor (EGF)

|                              |                                                                                                            |                               |                                          |
|------------------------------|------------------------------------------------------------------------------------------------------------|-------------------------------|------------------------------------------|
| <b>Source:</b>               | Human A431 cells                                                                                           | <b>Ligand:</b>                | 0.080 nM [ <sup>125</sup> I] EGF (human) |
| <b>Vehicle:</b>              | 1% DMSO                                                                                                    | <b>Non-Specific Ligand:</b>   | 0.10 μM EGF (human)                      |
| <b>Incubation Time/Temp:</b> | 60 minutes @ 25°C                                                                                          | <b>Specific Binding:</b>      | 90% *                                    |
| <b>Incubation Buffer:</b>    | 50 mM HEPES, pH 7.7, 0.1% BSA, 1.2 mM CaCl <sub>2</sub> , 5 mM KCl, 1.2 mM MgSO <sub>4</sub> , 138 mM NaCl | <b>Quantitation Method:</b>   | Radioligand Binding                      |
| <b>Kd:</b>                   | 0.17 nM *                                                                                                  | <b>Significance Criteria:</b> | ≥50% of max stimulation or inhibition    |
|                              |                                                                                                            | <b>Bmax:</b>                  | 5.50 pmole/mg Protein *                  |

### ■ 226010 Estrogen ER<sub>α</sub>

|                              |                                                          |                               |                                       |
|------------------------------|----------------------------------------------------------|-------------------------------|---------------------------------------|
| <b>Source:</b>               | Human recombinant insect Sf9 cells                       | <b>Ligand:</b>                | 0.50 nM [ <sup>3</sup> H] Estradiol   |
| <b>Vehicle:</b>              | 1% DMSO                                                  | <b>Non-Specific Ligand:</b>   | 1.0 μM Diethylstilbestrol             |
| <b>Incubation Time/Temp:</b> | 2 hours @ 25°C                                           | <b>Specific Binding:</b>      | 85% *                                 |
| <b>Incubation Buffer:</b>    | 10 mM Tris-HCl, pH 7.4, 0.1% BSA, 10% Glycerol, 1 mM DTT | <b>Quantitation Method:</b>   | Radioligand Binding                   |
| <b>Kd:</b>                   | 0.20 nM *                                                | <b>Significance Criteria:</b> | ≥50% of max stimulation or inhibition |
|                              |                                                          | <b>Bmax:</b>                  | 1400 pmole/mg Protein *               |

\* Historical Values

Broad Institute

Study #: AB13141, Quote #: 30266-1, Compound Code: BRD-K83634925-001-01-1 (1162315)

Tuesday, June 26, 2012

Page 14 of 28

## Methods

### ■ 226600 GABA<sub>A</sub>, Flunitrazepam, Central

|                              |                                     |                               |                                        |
|------------------------------|-------------------------------------|-------------------------------|----------------------------------------|
| <b>Source:</b>               | Wistar Rat brain (minus cerebellum) | <b>Ligand:</b>                | 1.0 nM [ <sup>3</sup> H] Flunitrazepam |
| <b>Vehicle:</b>              | 1% DMSO                             | <b>Non-Specific Ligand:</b>   | 10.0 μM Diazepam                       |
| <b>Incubation Time/Temp:</b> | 60 minutes @ 25°C                   | <b>Specific Binding:</b>      | 91% *                                  |
| <b>Incubation Buffer:</b>    | 50 mM Phosphate Buffer, pH 7.4      | <b>Quantitation Method:</b>   | Radioligand Binding                    |
| <b>Kd:</b>                   | 4.40 nM *                           | <b>Significance Criteria:</b> | ≥50% of max stimulation or inhibition  |
|                              |                                     | <b>Bmax:</b>                  | 1.20 pmole/mg Protein *                |

### ■ 226500 GABA<sub>A</sub>, Muscimol, Central

|                              |                                     |                               |                                       |
|------------------------------|-------------------------------------|-------------------------------|---------------------------------------|
| <b>Source:</b>               | Wistar Rat brain (minus cerebellum) | <b>Ligand:</b>                | 1.0 nM [ <sup>3</sup> H] Muscimol     |
| <b>Vehicle:</b>              | 1% DMSO                             | <b>Non-Specific Ligand:</b>   | 0.10 μM Muscimol                      |
| <b>Incubation Time/Temp:</b> | 10 minutes @ 4°C                    | <b>Specific Binding:</b>      | 90% *                                 |
| <b>Incubation Buffer:</b>    | 50 mM Tris-HCl, pH 7.4              | <b>Quantitation Method:</b>   | Radioligand Binding                   |
| <b>Kd:</b>                   | 3.80 nM *                           | <b>Significance Criteria:</b> | ≥50% of max stimulation or inhibition |
|                              |                                     | <b>Bmax:</b>                  | 1.80 pmole/mg Protein *               |

### ■ 228610 GABA<sub>B1A</sub>

|                              |                                                             |                               |                                       |
|------------------------------|-------------------------------------------------------------|-------------------------------|---------------------------------------|
| <b>Source:</b>               | Human recombinant CHO cells                                 | <b>Ligand:</b>                | 4.0 nM [ <sup>3</sup> H] CGP-54626    |
| <b>Vehicle:</b>              | 1% DMSO                                                     | <b>Non-Specific Ligand:</b>   | 3.0 mM GABA                           |
| <b>Incubation Time/Temp:</b> | 3 hours @ 25°C                                              | <b>Specific Binding:</b>      | 90% *                                 |
| <b>Incubation Buffer:</b>    | 50 mM Tris-HCl, pH 7.4, 2.5 mM CaCl <sub>2</sub> , 0.1% BSA | <b>Quantitation Method:</b>   | Radioligand Binding                   |
| <b>Kd:</b>                   | 3.30 nM *                                                   | <b>Significance Criteria:</b> | ≥50% of max stimulation or inhibition |
|                              |                                                             | <b>Bmax:</b>                  | 48.0 pmole/mg Protein *               |

### ■ 232030 Glucocorticoid

|                              |                                                                                                                                            |                               |                                        |
|------------------------------|--------------------------------------------------------------------------------------------------------------------------------------------|-------------------------------|----------------------------------------|
| <b>Source:</b>               | Human recombinant Insect cells                                                                                                             | <b>Ligand:</b>                | 5.0 nM [ <sup>3</sup> H] Dexamethasone |
| <b>Vehicle:</b>              | 1% DMSO                                                                                                                                    | <b>Non-Specific Ligand:</b>   | 10.0 μM Dexamethasone                  |
| <b>Incubation Time/Temp:</b> | 1 day @ 4°C                                                                                                                                | <b>Specific Binding:</b>      | 97% *                                  |
| <b>Incubation Buffer:</b>    | 5 mM KH <sub>2</sub> PO <sub>4</sub> , 8 mM Na <sub>2</sub> HPO <sub>4</sub> ·12H <sub>2</sub> O, pH7.4, 137 mM NaCl, 2.7 mM KCl, 0.2% BSA | <b>Quantitation Method:</b>   | Radioligand Binding                    |
| <b>Kd:</b>                   | 4.60 nM *                                                                                                                                  | <b>Significance Criteria:</b> | ≥50% of max stimulation or inhibition  |
|                              |                                                                                                                                            | <b>Bmax:</b>                  | 1.0 pmole/mg *                         |

\* Historical Values

Broad Institute

Study #: AB13141, Quote #: 30266-1, Compound Code: BRD-K83634925-001-01-1 (1162315)

Tuesday, June 26, 2012

Page 15 of 28

## Methods

### ■ 232700 Glutamate, Kainate

|                              |                                     |                               |                                       |
|------------------------------|-------------------------------------|-------------------------------|---------------------------------------|
| <b>Source:</b>               | Wistar Rat brain (minus cerebellum) | <b>Ligand:</b>                | 5.0 nM [ <sup>3</sup> H] Kainic acid  |
| <b>Vehicle:</b>              | 1% DMSO                             | <b>Non-Specific Ligand:</b>   | 1.0 mM L-Glutamic acid                |
| <b>Incubation Time/Temp:</b> | 60 minutes @ 4°C                    | <b>Specific Binding:</b>      | 80% *                                 |
| <b>Incubation Buffer:</b>    | 50 mM Tris-HCl, pH 7.4              | <b>Quantitation Method:</b>   | Radioligand Binding                   |
| <b>Kd:</b>                   | 0.012 μM *                          | <b>Significance Criteria:</b> | ≥50% of max stimulation or inhibition |
|                              |                                     | <b>Bmax:</b>                  | 0.35 pmole/mg Protein *               |

### ■ 232810 Glutamate, NMDA, Agonism

|                              |                            |                               |                                       |
|------------------------------|----------------------------|-------------------------------|---------------------------------------|
| <b>Source:</b>               | Wistar Rat cerebral cortex | <b>Ligand:</b>                | 2.0 nM [ <sup>3</sup> H] CGP-39653    |
| <b>Vehicle:</b>              | 1% DMSO                    | <b>Non-Specific Ligand:</b>   | 1.0 mM L-Glutamic acid                |
| <b>Incubation Time/Temp:</b> | 20 minutes @ 4°C           | <b>Specific Binding:</b>      | 70% *                                 |
| <b>Incubation Buffer:</b>    | 50 mM Tris-HCl, pH 7.4     | <b>Quantitation Method:</b>   | Radioligand Binding                   |
| <b>Kd:</b>                   | 0.019 μM *                 | <b>Significance Criteria:</b> | ≥50% of max stimulation or inhibition |
|                              |                            | <b>Bmax:</b>                  | 2.30 pmole/mg Protein *               |

### ■ 232910 Glutamate, NMDA, Glycine

|                              |                            |                               |                                       |
|------------------------------|----------------------------|-------------------------------|---------------------------------------|
| <b>Source:</b>               | Wistar Rat cerebral cortex | <b>Ligand:</b>                | 0.33 nM [ <sup>3</sup> H] MDL 105,519 |
| <b>Vehicle:</b>              | 1% DMSO                    | <b>Non-Specific Ligand:</b>   | 10.0 μM MDL 105,519                   |
| <b>Incubation Time/Temp:</b> | 30 minutes @ 4°C           | <b>Specific Binding:</b>      | 85% *                                 |
| <b>Incubation Buffer:</b>    | 50 mM HEPES, pH 7.7        | <b>Quantitation Method:</b>   | Radioligand Binding                   |
| <b>Kd:</b>                   | 6.0 nM *                   | <b>Significance Criteria:</b> | ≥50% of max stimulation or inhibition |
|                              |                            | <b>Bmax:</b>                  | 3.70 pmole/mg Protein *               |

### ■ 233000 Glutamate, NMDA, Phencyclidine

|                              |                            |                               |                                       |
|------------------------------|----------------------------|-------------------------------|---------------------------------------|
| <b>Source:</b>               | Wistar Rat cerebral cortex | <b>Ligand:</b>                | 4.0 nM [ <sup>3</sup> H] TCP          |
| <b>Vehicle:</b>              | 1% DMSO                    | <b>Non-Specific Ligand:</b>   | 1.0 μM Dizocilpine ((+)-MK-801)       |
| <b>Incubation Time/Temp:</b> | 45 minutes @ 25°C          | <b>Specific Binding:</b>      | 94% *                                 |
| <b>Incubation Buffer:</b>    | 10 mM Tris-HCl, pH 7.4     | <b>Quantitation Method:</b>   | Radioligand Binding                   |
| <b>Kd:</b>                   | 8.40 nM *                  | <b>Significance Criteria:</b> | ≥50% of max stimulation or inhibition |
|                              |                            | <b>Bmax:</b>                  | 0.78 pmole/mg Protein *               |

\* Historical Values

Broad Institute

Study #: AB13141, Quote #: 30266-1, Compound Code: BRD-K83634925-001-01-1 (1162315)

Tuesday, June 26, 2012

Page 16 of 28



## Methods

### ■ 239610 Histamine H<sub>1</sub>

|                              |                                                                                 |                               |                                       |
|------------------------------|---------------------------------------------------------------------------------|-------------------------------|---------------------------------------|
| <b>Source:</b>               | Human recombinant CHO-K1 cells                                                  | <b>Ligand:</b>                | 1.20 nM [ <sup>3</sup> H] Pyrilamine  |
| <b>Vehicle:</b>              | 1% DMSO                                                                         | <b>Non-Specific Ligand:</b>   | 1.0 μM Pyrilamine                     |
| <b>Incubation Time/Temp:</b> | 3 hours @ 25°C                                                                  | <b>Specific Binding:</b>      | 94% *                                 |
| <b>Incubation Buffer:</b>    | 50 mM Tris-HCl, pH 7.4, 2 mM MgCl <sub>2</sub> ,<br>100 mM NaCl, 250 mM Sucrose | <b>Quantitation Method:</b>   | Radioligand Binding                   |
| <b>Kd:</b>                   | 1.10 nM *                                                                       | <b>Significance Criteria:</b> | ≥50% of max stimulation or inhibition |
|                              |                                                                                 | <b>Bmax:</b>                  | 6.70 pmole/mg Protein *               |

### ■ 239710 Histamine H<sub>2</sub>

|                              |                                |                               |                                              |
|------------------------------|--------------------------------|-------------------------------|----------------------------------------------|
| <b>Source:</b>               | Human recombinant CHO-K1 cells | <b>Ligand:</b>                | 0.10 nM [ <sup>125</sup> I] Aminopotentidine |
| <b>Vehicle:</b>              | 1% DMSO                        | <b>Non-Specific Ligand:</b>   | 3.0 μM Tiotidine                             |
| <b>Incubation Time/Temp:</b> | 2 hours @ 25°C                 | <b>Specific Binding:</b>      | 90% *                                        |
| <b>Incubation Buffer:</b>    | 50 mM Phosphate, pH 7.4        | <b>Quantitation Method:</b>   | Radioligand Binding                          |
| <b>Kd:</b>                   | 0.45 nM *                      | <b>Significance Criteria:</b> | ≥50% of max stimulation or inhibition        |
|                              |                                | <b>Bmax:</b>                  | 6.90 pmole/mg Protein *                      |

### ■ 239820 Histamine H<sub>3</sub>

|                              |                                                              |                               |                                                      |
|------------------------------|--------------------------------------------------------------|-------------------------------|------------------------------------------------------|
| <b>Source:</b>               | Human recombinant CHO-K1 cells                               | <b>Ligand:</b>                | 0.40 nM [ <sup>3</sup> H] N-α-Methylhistamine (NAMH) |
| <b>Vehicle:</b>              | 1% DMSO                                                      | <b>Non-Specific Ligand:</b>   | 1.0 μM R(-)-α-Methylhistamine (RAMH)                 |
| <b>Incubation Time/Temp:</b> | 2 hours @ 25°C                                               | <b>Specific Binding:</b>      | 90% *                                                |
| <b>Incubation Buffer:</b>    | 50 mM Tris-HCl, pH 7.4, 5 mM MgCl <sub>2</sub> ,<br>0.1% BSA | <b>Quantitation Method:</b>   | Radioligand Binding                                  |
| <b>Kd:</b>                   | 0.38 nM *                                                    | <b>Significance Criteria:</b> | ≥50% of max stimulation or inhibition                |
|                              |                                                              | <b>Bmax:</b>                  | 2.0 pmole/mg Protein *                               |

### ■ 241000 Imidazoline I<sub>2</sub>, Central

|                              |                                        |                               |                                       |
|------------------------------|----------------------------------------|-------------------------------|---------------------------------------|
| <b>Source:</b>               | Wistar Rat cerebral cortex             | <b>Ligand:</b>                | 2.0 nM [ <sup>3</sup> H] Idazoxan     |
| <b>Vehicle:</b>              | 1% DMSO                                | <b>Non-Specific Ligand:</b>   | 1.0 μM Idazoxan                       |
| <b>Incubation Time/Temp:</b> | 30 minutes @ 25°C                      | <b>Specific Binding:</b>      | 85% *                                 |
| <b>Incubation Buffer:</b>    | 50 mM Tris-HCl, pH 7.4, 0.5 mM<br>EDTA | <b>Quantitation Method:</b>   | Radioligand Binding                   |
| <b>Kd:</b>                   | 4.0 nM *                               | <b>Significance Criteria:</b> | ≥50% of max stimulation or inhibition |
|                              |                                        | <b>Bmax:</b>                  | 0.14 pmole/mg Protein *               |

\* Historical Values

Broad Institute

Study #: AB13141, Quote #: 30266-1, Compound Code: BRD-K83634925-001-01-1 (1162315)

Tuesday, June 26, 2012

Page 17 of 28

## Methods

### ■ 243520 Interleukin IL-1

|                              |                                                           |                               |                                            |
|------------------------------|-----------------------------------------------------------|-------------------------------|--------------------------------------------|
| <b>Source:</b>               | Mouse 3T3-SWISS cells                                     | <b>Ligand:</b>                | 0.10 nM [ <sup>125</sup> I] Interleukin-1β |
| <b>Vehicle:</b>              | 1% DMSO                                                   | <b>Non-Specific Ligand:</b>   | 10.0 μM Interleukin-1β                     |
| <b>Incubation Time/Temp:</b> | 2 hours @ 37°C                                            | <b>Specific Binding:</b>      | 80% *                                      |
| <b>Incubation Buffer:</b>    | RPMI 1640, 20 mM HEPES, pH 7.4, 0.1% Sodium Azide, 1% BSA | <b>Quantitation Method:</b>   | Radioligand Binding                        |
| <b>Kd:</b>                   | 0.25 nM *                                                 | <b>Significance Criteria:</b> | ≥50% of max stimulation or inhibition      |
|                              |                                                           | <b>Bmax:</b>                  | 820 R/cell Protein *                       |

### ■ 250460 Leukotriene, Cysteinyl CysLT<sub>1</sub>

|                              |                                                                                                                               |                               |                                            |
|------------------------------|-------------------------------------------------------------------------------------------------------------------------------|-------------------------------|--------------------------------------------|
| <b>Source:</b>               | Human recombinant CHO-K1 cells                                                                                                | <b>Ligand:</b>                | 0.30 nM [ <sup>3</sup> H] LTD <sub>4</sub> |
| <b>Vehicle:</b>              | 1% DMSO                                                                                                                       | <b>Non-Specific Ligand:</b>   | 0.30 μM LTD <sub>4</sub>                   |
| <b>Incubation Time/Temp:</b> | 30 minutes @ 25°C                                                                                                             | <b>Specific Binding:</b>      | 93% *                                      |
| <b>Incubation Buffer:</b>    | 50 mM Tris-HCl, pH 7.4, 5 mM CaCl <sub>2</sub> , 5 mM MgCl <sub>2</sub> , 100 μg/ml Bacitracin, 1 mM Benzamidine, 0.1 mM PMSF | <b>Quantitation Method:</b>   | Radioligand Binding                        |
| <b>Kd:</b>                   | 0.21 nM *                                                                                                                     | <b>Significance Criteria:</b> | ≥50% of max stimulation or inhibition      |
|                              |                                                                                                                               | <b>Bmax:</b>                  | 3.0 pmole/mg Protein *                     |

### ■ 251600 Melatonin MT<sub>1</sub>

|                              |                                                                                 |                               |                                              |
|------------------------------|---------------------------------------------------------------------------------|-------------------------------|----------------------------------------------|
| <b>Source:</b>               | Human recombinant CHO-K1 cells                                                  | <b>Ligand:</b>                | 0.050 nM [ <sup>125</sup> I] 2-Iodometatonin |
| <b>Vehicle:</b>              | 1% DMSO                                                                         | <b>Non-Specific Ligand:</b>   | 1.0 μM 6-Chlorometatonin                     |
| <b>Incubation Time/Temp:</b> | 3 hours @ 25°C                                                                  | <b>Specific Binding:</b>      | 97% *                                        |
| <b>Incubation Buffer:</b>    | 25 mM HEPES, pH 7.4, 5 mM MgCl <sub>2</sub> , 1 mM CaCl <sub>2</sub> , 0.5% BSA | <b>Quantitation Method:</b>   | Radioligand Binding                          |
| <b>Kd:</b>                   | 0.054 nM *                                                                      | <b>Significance Criteria:</b> | ≥50% of max stimulation or inhibition        |
|                              |                                                                                 | <b>Bmax:</b>                  | 3.50 pmole/mg Protein *                      |

### ■ 252610 Muscarinic M<sub>1</sub>

|                              |                                                             |                               |                                               |
|------------------------------|-------------------------------------------------------------|-------------------------------|-----------------------------------------------|
| <b>Source:</b>               | Human recombinant CHO-K1 cells                              | <b>Ligand:</b>                | 0.80 nM [ <sup>3</sup> H] N-Methylscopolamine |
| <b>Vehicle:</b>              | 1% DMSO                                                     | <b>Non-Specific Ligand:</b>   | 1.0 μM Atropine                               |
| <b>Incubation Time/Temp:</b> | 2 hours @ 25°C                                              | <b>Specific Binding:</b>      | 95% *                                         |
| <b>Incubation Buffer:</b>    | 50 mM Tris-HCl, pH 7.4, 10 mM MgCl <sub>2</sub> , 1 mM EDTA | <b>Quantitation Method:</b>   | Radioligand Binding                           |
| <b>Kd:</b>                   | 0.26 nM *                                                   | <b>Significance Criteria:</b> | ≥50% of max stimulation or inhibition         |
|                              |                                                             | <b>Bmax:</b>                  | 2.0 pmole/mg Protein *                        |

\* Historical Values

Broad Institute

Study #: AB13141, Quote #: 30266-1, Compound Code: BRD-K83634925-001-01-1 (1162315)

Tuesday, June 26, 2012

Page 18 of 28

## Methods

### ■ 252710 Muscarinic M<sub>2</sub>

|                              |                                                             |                               |                                               |
|------------------------------|-------------------------------------------------------------|-------------------------------|-----------------------------------------------|
| <b>Source:</b>               | Human recombinant CHO-K1 cells                              | <b>Ligand:</b>                | 0.80 nM [ <sup>3</sup> H] N-Methylscopolamine |
| <b>Vehicle:</b>              | 1% DMSO                                                     | <b>Non-Specific Ligand:</b>   | 1.0 μM Atropine                               |
| <b>Incubation Time/Temp:</b> | 2 hours @ 25°C                                              | <b>Specific Binding:</b>      | 95% *                                         |
| <b>Incubation Buffer:</b>    | 50 mM Tris-HCl, pH 7.4, 10 mM MgCl <sub>2</sub> , 1 mM EDTA | <b>Quantitation Method:</b>   | Radioligand Binding                           |
| <b>Kd:</b>                   | 0.58 nM *                                                   | <b>Significance Criteria:</b> | ≥50% of max stimulation or inhibition         |
|                              |                                                             | <b>Bmax:</b>                  | 5.10 pmole/mg Protein *                       |

### ■ 252810 Muscarinic M<sub>3</sub>

|                              |                                                             |                               |                                               |
|------------------------------|-------------------------------------------------------------|-------------------------------|-----------------------------------------------|
| <b>Source:</b>               | Human recombinant CHO-K1 cells                              | <b>Ligand:</b>                | 0.80 nM [ <sup>3</sup> H] N-Methylscopolamine |
| <b>Vehicle:</b>              | 1% DMSO                                                     | <b>Non-Specific Ligand:</b>   | 1.0 μM Atropine                               |
| <b>Incubation Time/Temp:</b> | 2 hours @ 25°C                                              | <b>Specific Binding:</b>      | 95% *                                         |
| <b>Incubation Buffer:</b>    | 50 mM Tris-HCl, pH 7.4, 10 mM MgCl <sub>2</sub> , 1 mM EDTA | <b>Quantitation Method:</b>   | Radioligand Binding                           |
| <b>Kd:</b>                   | 0.75 nM *                                                   | <b>Significance Criteria:</b> | ≥50% of max stimulation or inhibition         |
|                              |                                                             | <b>Bmax:</b>                  | 5.40 pmole/mg Protein *                       |

### ■ 257010 Neuropeptide Y Y<sub>1</sub>

|                              |                                                                                                     |                               |                                         |
|------------------------------|-----------------------------------------------------------------------------------------------------|-------------------------------|-----------------------------------------|
| <b>Source:</b>               | Human SK-N-MC cells                                                                                 | <b>Ligand:</b>                | 0.015 nM [ <sup>125</sup> I] Peptide YY |
| <b>Vehicle:</b>              | 1% DMSO                                                                                             | <b>Non-Specific Ligand:</b>   | 1.0 μM Neuropeptide Y (human, rat)      |
| <b>Incubation Time/Temp:</b> | 60 minutes @ 37°C                                                                                   | <b>Specific Binding:</b>      | 80% *                                   |
| <b>Incubation Buffer:</b>    | 25 mM HEPES, pH 7.4, 1 mM MgCl <sub>2</sub> , 2.5 mM CaCl <sub>2</sub> , 0.1% BSA, 0.01% Bacitracin | <b>Quantitation Method:</b>   | Radioligand Binding                     |
| <b>Kd:</b>                   | 0.24 nM *                                                                                           | <b>Significance Criteria:</b> | ≥50% of max stimulation or inhibition   |
|                              |                                                                                                     | <b>Bmax:</b>                  | 0.58 pmole/mg protein *                 |

### ■ 257110 Neuropeptide Y Y<sub>2</sub>

|                              |                                                                                          |                               |                                         |
|------------------------------|------------------------------------------------------------------------------------------|-------------------------------|-----------------------------------------|
| <b>Source:</b>               | Human KAN-TS cells                                                                       | <b>Ligand:</b>                | 10 pM [ <sup>125</sup> I] Peptide YY    |
| <b>Vehicle:</b>              | 1% DMSO                                                                                  | <b>Non-Specific Ligand:</b>   | 1.0 μM Neuropeptide Y (13-36) (porcine) |
| <b>Incubation Time/Temp:</b> | 2 hours @ 37°C                                                                           | <b>Specific Binding:</b>      | 90% *                                   |
| <b>Incubation Buffer:</b>    | 25 mM HEPES, pH 7.4, 2.5 mM CaCl <sub>2</sub> , 1 mM MgCl <sub>2</sub> , 0.1% Bacitracin | <b>Quantitation Method:</b>   | Radioligand Binding                     |
| <b>Kd:</b>                   | 0.012 nM *                                                                               | <b>Significance Criteria:</b> | ≥50% of max stimulation or inhibition   |
|                              |                                                                                          | <b>Bmax:</b>                  | 0.5 pmole/mg Protein *                  |

\* Historical Values

Broad Institute

Study #: AB13141, Quote #: 30266-1, Compound Code: BRD-K83634925-001-01-1 (1162315)

Tuesday, June 26, 2012

Page 19 of 28

## Methods

### ■ 258590 Nicotinic Acetylcholine

|                              |                                                                                                 |                               |                                         |
|------------------------------|-------------------------------------------------------------------------------------------------|-------------------------------|-----------------------------------------|
| <b>Source:</b>               | Human IMR-32 cells                                                                              | <b>Ligand:</b>                | 0.10 nM [ <sup>125</sup> I] Epibatidine |
| <b>Vehicle:</b>              | 1% DMSO                                                                                         | <b>Non-Specific Ligand:</b>   | 300 μM (-)-Nicotine                     |
| <b>Incubation Time/Temp:</b> | 60 minutes @ 25°C                                                                               | <b>Specific Binding:</b>      | 97% *                                   |
| <b>Incubation Buffer:</b>    | 20 mM HEPES, pH 7.5, 150 mM NaCl, 1.5 mM KCl, 2 mM CaCl <sub>2</sub> , 1 mM MgSO <sub>4</sub> . | <b>Quantitation Method:</b>   | Radioligand Binding                     |
| <b>Kd:</b>                   | 0.22 nM *                                                                                       | <b>Significance Criteria:</b> | ≥50% of max stimulation or inhibition   |
|                              |                                                                                                 | <b>Bmax:</b>                  | 0.46 pmole/mg Protein *                 |

### ■ 258700 Nicotinic Acetylcholine α1, Bungarotoxin

|                              |                                                 |                               |                                            |
|------------------------------|-------------------------------------------------|-------------------------------|--------------------------------------------|
| <b>Source:</b>               | Human RD cells                                  | <b>Ligand:</b>                | 0.60 nM [ <sup>125</sup> I] α-Bungarotoxin |
| <b>Vehicle:</b>              | 1% DMSO                                         | <b>Non-Specific Ligand:</b>   | 1.0 μM α-Bungarotoxin                      |
| <b>Incubation Time/Temp:</b> | 2 hours @ 25°C                                  | <b>Specific Binding:</b>      | 85% *                                      |
| <b>Incubation Buffer:</b>    | 150 mM NaCl, 4 mM KCl, 2.3 mM CaCl <sub>2</sub> | <b>Quantitation Method:</b>   | Radioligand Binding                        |
| <b>Kd:</b>                   | 1.10 nM *                                       | <b>Significance Criteria:</b> | ≥50% of max stimulation or inhibition      |
|                              |                                                 | <b>Bmax:</b>                  | 1.0 pmole/mg Protein *                     |

### ■ 260130 Opiate δ<sub>1</sub> (OP1, DOP)

|                              |                                                            |                               |                                       |
|------------------------------|------------------------------------------------------------|-------------------------------|---------------------------------------|
| <b>Source:</b>               | Human recombinant HEK-293 cells                            | <b>Ligand:</b>                | 1.30 nM [ <sup>3</sup> H] Naltrindole |
| <b>Vehicle:</b>              | 1% DMSO                                                    | <b>Non-Specific Ligand:</b>   | 1.0 μM Naltrindole                    |
| <b>Incubation Time/Temp:</b> | 60 minutes @ 25°C                                          | <b>Specific Binding:</b>      | 95% *                                 |
| <b>Incubation Buffer:</b>    | 50 mM Tris-HCl, pH 7.4, 1 mM EDTA, 10 mM MgCl <sub>2</sub> | <b>Quantitation Method:</b>   | Radioligand Binding                   |
| <b>Kd:</b>                   | 0.27 nM *                                                  | <b>Significance Criteria:</b> | ≥50% of max stimulation or inhibition |
|                              |                                                            | <b>Bmax:</b>                  | 7.60 pmole/mg Protein *               |

### ■ 260210 Opiate κ(OP2, KOP)

|                              |                                 |                               |                                         |
|------------------------------|---------------------------------|-------------------------------|-----------------------------------------|
| <b>Source:</b>               | Human recombinant HEK-293 cells | <b>Ligand:</b>                | 0.60 nM [ <sup>3</sup> H] Diprenorphine |
| <b>Vehicle:</b>              | 1% DMSO                         | <b>Non-Specific Ligand:</b>   | 10.0 μM Naloxone                        |
| <b>Incubation Time/Temp:</b> | 60 minutes @ 25°C               | <b>Specific Binding:</b>      | 90% *                                   |
| <b>Incubation Buffer:</b>    | 50 mM Tris-HCl, pH 7.4          | <b>Quantitation Method:</b>   | Radioligand Binding                     |
| <b>Kd:</b>                   | 0.40 nM *                       | <b>Significance Criteria:</b> | ≥50% of max stimulation or inhibition   |
|                              |                                 | <b>Bmax:</b>                  | 1.10 pmole/mg Protein *                 |

\* Historical Values

Broad Institute

Study #: AB13141, Quote #: 30266-1, Compound Code: BRD-K83634925-001-01-1 (1162315)

Tuesday, June 26, 2012

Page 20 of 28

## Methods

### ■ 260410 Opiate $\mu$ (OP3, MOP)

|                              |                                |                               |                                             |
|------------------------------|--------------------------------|-------------------------------|---------------------------------------------|
| <b>Source:</b>               | Human recombinant CHO-K1 cells | <b>Ligand:</b>                | 0.60 nM [ <sup>3</sup> H] Diprenorphine     |
| <b>Vehicle:</b>              | 1% DMSO                        | <b>Non-Specific Ligand:</b>   | 10.0 $\mu$ M Naloxone                       |
| <b>Incubation Time/Temp:</b> | 60 minutes @ 25°C              | <b>Specific Binding:</b>      | 90% *                                       |
| <b>Incubation Buffer:</b>    | 50 mM Tris-HCl, pH 7.4         | <b>Quantitation Method:</b>   | Radioligand Binding                         |
| <b>Kd:</b>                   | 0.41 nM *                      | <b>Significance Criteria:</b> | $\geq$ 50% of max stimulation or inhibition |
|                              |                                | <b>Bmax:</b>                  | 3.80 pmole/mg Protein *                     |

### ■ 264500 Phorbol Ester

|                              |                                                |                               |                                             |
|------------------------------|------------------------------------------------|-------------------------------|---------------------------------------------|
| <b>Source:</b>               | ICR Mouse brain                                | <b>Ligand:</b>                | 3.0 nM [ <sup>3</sup> H] PDBu               |
| <b>Vehicle:</b>              | 1% DMSO                                        | <b>Non-Specific Ligand:</b>   | 1.0 $\mu$ M PDBu                            |
| <b>Incubation Time/Temp:</b> | 60 minutes @ 25°C                              | <b>Specific Binding:</b>      | 80% *                                       |
| <b>Incubation Buffer:</b>    | 20 mM Tris-HCl, pH 7.4, 5 mM CaCl <sub>2</sub> | <b>Quantitation Method:</b>   | Radioligand Binding                         |
| <b>Kd:</b>                   | 8.70 nM *                                      | <b>Significance Criteria:</b> | $\geq$ 50% of max stimulation or inhibition |
|                              |                                                | <b>Bmax:</b>                  | 26.0 pmole/mg Protein *                     |

### ■ 265010 Platelet Activating Factor (PAF)

|                              |                                                                                   |                               |                                             |
|------------------------------|-----------------------------------------------------------------------------------|-------------------------------|---------------------------------------------|
| <b>Source:</b>               | Human platelets                                                                   | <b>Ligand:</b>                | 0.12 nM [ <sup>3</sup> H] PAF               |
| <b>Vehicle:</b>              | 1% DMSO                                                                           | <b>Non-Specific Ligand:</b>   | 1.0 $\mu$ M PAF                             |
| <b>Incubation Time/Temp:</b> | 3 hours @ 25°C                                                                    | <b>Specific Binding:</b>      | 90% *                                       |
| <b>Incubation Buffer:</b>    | 50 mM Tris-HCl, pH 7.4, 100 mM KCl, 5 mM EDTA, 5 mM MgCl <sub>2</sub> , 0.25% BSA | <b>Quantitation Method:</b>   | Radioligand Binding                         |
| <b>Kd:</b>                   | 0.13 nM *                                                                         | <b>Significance Criteria:</b> | $\geq$ 50% of max stimulation or inhibition |
|                              |                                                                                   | <b>Bmax:</b>                  | 120 R/cell *                                |

### ■ 265600 Potassium Channel [K<sub>ATP</sub>]

|                              |                                              |                               |                                             |
|------------------------------|----------------------------------------------|-------------------------------|---------------------------------------------|
| <b>Source:</b>               | Hamster pancreatic HIT-T15 beta cells        | <b>Ligand:</b>                | 5.0 nM [ <sup>3</sup> H] Glyburide          |
| <b>Vehicle:</b>              | 1% DMSO                                      | <b>Non-Specific Ligand:</b>   | 1.0 $\mu$ M Glyburide                       |
| <b>Incubation Time/Temp:</b> | 2 hours @ 25°C                               | <b>Specific Binding:</b>      | 90% *                                       |
| <b>Incubation Buffer:</b>    | 50 mM MOPS, pH 7.4, 0.1 mM CaCl <sub>2</sub> | <b>Quantitation Method:</b>   | Radioligand Binding                         |
| <b>Kd:</b>                   | 0.64 nM *                                    | <b>Significance Criteria:</b> | $\geq$ 50% of max stimulation or inhibition |
|                              |                                              | <b>Bmax:</b>                  | 1.0 pmole/mg Protein *                      |

\* Historical Values

Broad Institute

Study #: AB13141, Quote #: 30266-1, Compound Code: BRD-K83634925-001-01-1 (1162315)

Tuesday, June 26, 2012

Page 21 of 28

## Methods

### ■ 265900 Potassium Channel hERG

|                              |                                                                                                           |                               |                                       |
|------------------------------|-----------------------------------------------------------------------------------------------------------|-------------------------------|---------------------------------------|
| <b>Source:</b>               | Human recombinant HEK-293 cells                                                                           | <b>Ligand:</b>                | 1.50 nM [ <sup>3</sup> H] Astemizole  |
| <b>Vehicle:</b>              | 1% DMSO                                                                                                   | <b>Non-Specific Ligand:</b>   | 10.0 μM Astemizole                    |
| <b>Incubation Time/Temp:</b> | 60 minutes @ 25°C                                                                                         | <b>Specific Binding:</b>      | 90% *                                 |
| <b>Incubation Buffer:</b>    | 10 mM HEPES, pH 7.4, 0.1% BSA, 5 mM KCl, 0.8 mM MgCl <sub>2</sub> , 130 mM NaCl, 1 mM EGTA, 10 mM Glucose | <b>Quantitation Method:</b>   | Radioligand Binding                   |
| <b>Kd:</b>                   | 6.80 nM *                                                                                                 | <b>Significance Criteria:</b> | ≥50% of max stimulation or inhibition |
|                              |                                                                                                           | <b>Bmax:</b>                  | 6.30 pmole/mg Protein *               |

### ■ 268420 Prostanoid EP<sub>4</sub>

|                              |                                                       |                               |                                                                           |
|------------------------------|-------------------------------------------------------|-------------------------------|---------------------------------------------------------------------------|
| <b>Source:</b>               | Human recombinant Chem-1 cells                        | <b>Ligand:</b>                | 1.0 nM [ <sup>3</sup> H] Prostaglandin E <sub>2</sub> (PGE <sub>2</sub> ) |
| <b>Vehicle:</b>              | 1% DMSO                                               | <b>Non-Specific Ligand:</b>   | 10.0 μM Prostaglandin E <sub>2</sub> (PGE <sub>2</sub> )                  |
| <b>Incubation Time/Temp:</b> | 2 hours @ 25°C                                        | <b>Specific Binding:</b>      | 90% *                                                                     |
| <b>Incubation Buffer:</b>    | 10 mM MES, pH 6.0, 1 mM EDTA, 10 mM MgCl <sub>2</sub> | <b>Quantitation Method:</b>   | Radioligand Binding                                                       |
| <b>Kd:</b>                   | 0.69 nM *                                             | <b>Significance Criteria:</b> | ≥50% of max stimulation or inhibition                                     |
|                              |                                                       | <b>Bmax:</b>                  | 4.30 pmole/mg Protein *                                                   |

### ■ 268700 Purinergic P<sub>2x</sub>

|                              |                                                   |                               |                                             |
|------------------------------|---------------------------------------------------|-------------------------------|---------------------------------------------|
| <b>Source:</b>               | New Zealand derived albino Rabbit urinary bladder | <b>Ligand:</b>                | 8.0 nM [ <sup>3</sup> H] α, β-Methylene-ATP |
| <b>Vehicle:</b>              | 1% DMSO                                           | <b>Non-Specific Ligand:</b>   | 100 μM β, γ-Methylene ATP                   |
| <b>Incubation Time/Temp:</b> | 30 minutes @ 25°C                                 | <b>Specific Binding:</b>      | 80% *                                       |
| <b>Incubation Buffer:</b>    | 50 mM Tris-HCl, pH 7.4                            | <b>Quantitation Method:</b>   | Radioligand Binding                         |
| <b>Kd1:</b>                  | 2.20 nM *                                         | <b>Significance Criteria:</b> | ≥50% of max stimulation or inhibition       |
| <b>Kd2:</b>                  | 2.20 μM *                                         | <b>Bmax1:</b>                 | 2.0 pmole/mg Protein *                      |
|                              |                                                   | <b>Bmax2:</b>                 | 790 pmole/mg Protein *                      |

### ■ 268810 Purinergic P<sub>2γ</sub>

|                              |                        |                               |                                       |
|------------------------------|------------------------|-------------------------------|---------------------------------------|
| <b>Source:</b>               | Wistar Rat brain       | <b>Ligand:</b>                | 0.10 nM [ <sup>35</sup> S] ATP-αS     |
| <b>Vehicle:</b>              | 1% DMSO                | <b>Non-Specific Ligand:</b>   | 10.0 μM ADP-βS                        |
| <b>Incubation Time/Temp:</b> | 60 minutes @ 25°C      | <b>Specific Binding:</b>      | 87% *                                 |
| <b>Incubation Buffer:</b>    | 50 mM Tris-HCl, pH 7.4 | <b>Quantitation Method:</b>   | Radioligand Binding                   |
| <b>Kd:</b>                   | 0.015 μM *             | <b>Significance Criteria:</b> | ≥50% of max stimulation or inhibition |
|                              |                        | <b>Bmax:</b>                  | 16.0 pmole/mg Protein *               |

\* Historical Values

Broad Institute

Study #: AB13141, Quote #: 30266-1, Compound Code: BRD-K83634925-001-01-1 (1162315)

Tuesday, June 26, 2012

Page 22 of 28

## Methods

### ■ 270000 Rolipram

|                              |                        |                               |                                       |
|------------------------------|------------------------|-------------------------------|---------------------------------------|
| <b>Source:</b>               | Wistar Rat brain       | <b>Ligand:</b>                | 1.80 nM [ <sup>3</sup> H] Rolipram    |
| <b>Vehicle:</b>              | 1% DMSO                | <b>Non-Specific Ligand:</b>   | 10.0 μM Rolipram                      |
| <b>Incubation Time/Temp:</b> | 60 minutes @ 4°C       | <b>Specific Binding:</b>      | 90% *                                 |
| <b>Incubation Buffer:</b>    | 50 mM Tris-HCl, pH 7.4 | <b>Quantitation Method:</b>   | Radioligand Binding                   |
| <b>Kd:</b>                   | 1.0 nM *               | <b>Significance Criteria:</b> | ≥50% of max stimulation or inhibition |
|                              |                        | <b>Bmax:</b>                  | 0.31 pmole/mg Protein *               |

### ■ 271110 Serotonin (5-Hydroxytryptamine) 5-HT<sub>1A</sub>

|                              |                                                                                  |                               |                                       |
|------------------------------|----------------------------------------------------------------------------------|-------------------------------|---------------------------------------|
| <b>Source:</b>               | Human recombinant CHO-K1 cells                                                   | <b>Ligand:</b>                | 1.50 nM [ <sup>3</sup> H] 8-OH-DPAT   |
| <b>Vehicle:</b>              | 1% DMSO                                                                          | <b>Non-Specific Ligand:</b>   | 10.0 μM Metergoline                   |
| <b>Incubation Time/Temp:</b> | 60 minutes @ 25°C                                                                | <b>Specific Binding:</b>      | 75% *                                 |
| <b>Incubation Buffer:</b>    | 50 mM Tris-HCl, pH 7.4, 0.1% Ascorbic Acid, 0.5 mM EDTA, 10 mM MgSO <sub>4</sub> | <b>Quantitation Method:</b>   | Radioligand Binding                   |
| <b>Kd:</b>                   | 2.0 nM *                                                                         | <b>Significance Criteria:</b> | ≥50% of max stimulation or inhibition |
|                              |                                                                                  | <b>Bmax:</b>                  | 1.30 pmole/mg Protein *               |

### ■ 271700 Serotonin (5-Hydroxytryptamine) 5-HT<sub>2B</sub>

|                              |                                                                     |                               |                                                            |
|------------------------------|---------------------------------------------------------------------|-------------------------------|------------------------------------------------------------|
| <b>Source:</b>               | Human recombinant CHO-K1 cells                                      | <b>Ligand:</b>                | 1.20 nM [ <sup>3</sup> H] Lysergic acid diethylamide (LSD) |
| <b>Vehicle:</b>              | 1% DMSO                                                             | <b>Non-Specific Ligand:</b>   | 10.0 μM Serotonin (5-HT)                                   |
| <b>Incubation Time/Temp:</b> | 60 minutes @ 37°C                                                   | <b>Specific Binding:</b>      | 80% *                                                      |
| <b>Incubation Buffer:</b>    | 50 mM Tris-HCl, pH 7.4, 4 mM CaCl <sub>2</sub> , 0.1% Ascorbic Acid | <b>Quantitation Method:</b>   | Radioligand Binding                                        |
| <b>Kd:</b>                   | 2.10 nM *                                                           | <b>Significance Criteria:</b> | ≥50% of max stimulation or inhibition                      |
|                              |                                                                     | <b>Bmax:</b>                  | 1.10 pmole/mg Protein *                                    |

### ■ 271910 Serotonin (5-Hydroxytryptamine) 5-HT<sub>3</sub>

|                              |                                                           |                               |                                       |
|------------------------------|-----------------------------------------------------------|-------------------------------|---------------------------------------|
| <b>Source:</b>               | Human recombinant HEK-293 cells                           | <b>Ligand:</b>                | 0.69 nM [ <sup>3</sup> H] GR-65630    |
| <b>Vehicle:</b>              | 1% DMSO                                                   | <b>Non-Specific Ligand:</b>   | 10.0 μM MDL 72222                     |
| <b>Incubation Time/Temp:</b> | 60 minutes @ 25°C                                         | <b>Specific Binding:</b>      | 90% *                                 |
| <b>Incubation Buffer:</b>    | 50 mM Tris-HCl, pH 7.4, 1 mM EDTA, 5 mM MgCl <sub>2</sub> | <b>Quantitation Method:</b>   | Radioligand Binding                   |
| <b>Kd:</b>                   | 0.20 nM *                                                 | <b>Significance Criteria:</b> | ≥50% of max stimulation or inhibition |
|                              |                                                           | <b>Bmax:</b>                  | 11.0 pmole/mg Protein *               |

\* Historical Values

Broad Institute

Study #: AB13141, Quote #: 30266-1, Compound Code: BRD-K83634925-001-01-1 (1162315)

Tuesday, June 26, 2012

Page 23 of 28

## Methods

### ■ 278110 Sigma $\sigma_1$

|                              |                                  |                               |                                             |
|------------------------------|----------------------------------|-------------------------------|---------------------------------------------|
| <b>Source:</b>               | Human Jurkat cells               | <b>Ligand:</b>                | 8.0 nM [ <sup>3</sup> H] Haloperidol        |
| <b>Vehicle:</b>              | 1% DMSO                          | <b>Non-Specific Ligand:</b>   | 10.0 $\mu$ M Haloperidol                    |
| <b>Incubation Time/Temp:</b> | 4 hours @ 25°C                   | <b>Specific Binding:</b>      | 80% *                                       |
| <b>Incubation Buffer:</b>    | 5 mM Potassium Phosphate, pH 7.5 | <b>Quantitation Method:</b>   | Radioligand Binding                         |
| <b>Kd:</b>                   | 5.80 nM *                        | <b>Significance Criteria:</b> | $\geq$ 50% of max stimulation or inhibition |
|                              |                                  | <b>Bmax:</b>                  | 0.71 pmole/mg Protein *                     |

### ■ 255520 Tachykinin NK<sub>1</sub>

|                              |                                                           |                               |                                             |
|------------------------------|-----------------------------------------------------------|-------------------------------|---------------------------------------------|
| <b>Source:</b>               | Human recombinant CHO cells                               | <b>Ligand:</b>                | 0.80 nM [ <sup>3</sup> H] Substance P       |
| <b>Vehicle:</b>              | 1% DMSO                                                   | <b>Non-Specific Ligand:</b>   | 10.0 $\mu$ M L-703,606                      |
| <b>Incubation Time/Temp:</b> | 90 minutes @ 4°C                                          | <b>Specific Binding:</b>      | 90% *                                       |
| <b>Incubation Buffer:</b>    | 20 mM HEPES, pH 7.4, 1 mM MnCl <sub>2</sub> ,<br>0.1% BSA | <b>Quantitation Method:</b>   | Radioligand Binding                         |
| <b>Kd:</b>                   | 2.10 nM *                                                 | <b>Significance Criteria:</b> | $\geq$ 50% of max stimulation or inhibition |
|                              |                                                           | <b>Bmax:</b>                  | 1.70 pmole/mg Protein *                     |

### ■ 285900 Thyroid Hormone

|                              |                                                                             |                               |                                               |
|------------------------------|-----------------------------------------------------------------------------|-------------------------------|-----------------------------------------------|
| <b>Source:</b>               | Wistar Rat liver                                                            | <b>Ligand:</b>                | 0.030 nM [ <sup>125</sup> I] Triiodothyronine |
| <b>Vehicle:</b>              | 1% DMSO                                                                     | <b>Non-Specific Ligand:</b>   | 1.0 $\mu$ M Triiodothyronine                  |
| <b>Incubation Time/Temp:</b> | 18 hours @ 4°C                                                              | <b>Specific Binding:</b>      | 77% *                                         |
| <b>Incubation Buffer:</b>    | 20 mM Tris-HCl, pH 7.6, 50 mM NaCl,<br>10% Glycerol, 2 mM EDTA, 5 mM<br>DTT | <b>Quantitation Method:</b>   | Radioligand Binding                           |
| <b>Kd:</b>                   | 0.034 nM *                                                                  | <b>Significance Criteria:</b> | $\geq$ 50% of max stimulation or inhibition   |
|                              |                                                                             | <b>Bmax:</b>                  | 0.16 pmole/mg Protein *                       |

### ■ 220320 Transporter, Dopamine (DAT)

|                              |                                                                              |                               |                                             |
|------------------------------|------------------------------------------------------------------------------|-------------------------------|---------------------------------------------|
| <b>Source:</b>               | Human recombinant CHO-K1 cells                                               | <b>Ligand:</b>                | 0.15 nM [ <sup>125</sup> I] RTI-55          |
| <b>Vehicle:</b>              | 1% DMSO                                                                      | <b>Non-Specific Ligand:</b>   | 10.0 $\mu$ M Nomifensine                    |
| <b>Incubation Time/Temp:</b> | 3 hours @ 4°C                                                                | <b>Specific Binding:</b>      | 90% *                                       |
| <b>Incubation Buffer:</b>    | 50 mM Tris-HCl, pH 7.4, 100 mM<br>NaCl, 1 $\mu$ M Leupeptin, 10 $\mu$ M PMSF | <b>Quantitation Method:</b>   | Radioligand Binding                         |
| <b>Kd:</b>                   | 0.58 nM *                                                                    | <b>Significance Criteria:</b> | $\geq$ 50% of max stimulation or inhibition |
|                              |                                                                              | <b>Bmax:</b>                  | 0.047 pmole/mg Protein *                    |

\* Historical Values

Broad Institute

Study #: AB13141, Quote #: 30266-1, Compound Code: BRD-K83634925-001-01-1 (1162315)

Tuesday, June 26, 2012

Page 24 of 28



## Methods

### ■ 226400 Transporter, GABA

|                              |                                                                                                                      |                               |                                       |
|------------------------------|----------------------------------------------------------------------------------------------------------------------|-------------------------------|---------------------------------------|
| <b>Source:</b>               | Wistar Rat cerebral cortex                                                                                           | <b>Ligand:</b>                | 6.0 nM [ <sup>3</sup> H] GABA         |
| <b>Vehicle:</b>              | 1% DMSO                                                                                                              | <b>Non-Specific Ligand:</b>   | 10.0 μM NO-711                        |
| <b>Incubation Time/Temp:</b> | 20 minutes @ 25°C                                                                                                    | <b>Specific Binding:</b>      | 80% *                                 |
| <b>Incubation Buffer:</b>    | 10 mM HEPES, pH 7.5, 120 mM NaCl, 4 mM Ca(CH <sub>3</sub> COO) <sub>2</sub> , 10 μM Isoguvacine, 10 μM S(-)-Baclofen | <b>Quantitation Method:</b>   | Radioligand Binding                   |
| <b>Kd:</b>                   | 0.30 μM *                                                                                                            | <b>Significance Criteria:</b> | ≥50% of max stimulation or inhibition |
|                              |                                                                                                                      | <b>Bmax:</b>                  | 60.0 pmole/mg Protein *               |

### ■ 204410 Transporter, Norepinephrine (NET)

|                              |                                                                 |                               |                                       |
|------------------------------|-----------------------------------------------------------------|-------------------------------|---------------------------------------|
| <b>Source:</b>               | Human recombinant MDCK cells                                    | <b>Ligand:</b>                | 0.20 nM [ <sup>125</sup> I] RTI-55    |
| <b>Vehicle:</b>              | 1% DMSO                                                         | <b>Non-Specific Ligand:</b>   | 10.0 μM Desipramine                   |
| <b>Incubation Time/Temp:</b> | 3 hours @ 4°C                                                   | <b>Specific Binding:</b>      | 75% *                                 |
| <b>Incubation Buffer:</b>    | 50 mM Tris-HCl, pH 7.4, 100 mM NaCl, 1 μM Leupeptin, 10 μM PMSF | <b>Quantitation Method:</b>   | Radioligand Binding                   |
| <b>Kd:</b>                   | 0.024 μM *                                                      | <b>Significance Criteria:</b> | ≥50% of max stimulation or inhibition |
|                              |                                                                 | <b>Bmax:</b>                  | 2.50 pmole/mg Protein *               |

### ■ 274030 Transporter, Serotonin (5-Hydroxytryptamine) (SERT)

|                              |                                               |                               |                                       |
|------------------------------|-----------------------------------------------|-------------------------------|---------------------------------------|
| <b>Source:</b>               | Human recombinant HEK-293 cells               | <b>Ligand:</b>                | 0.40 nM [ <sup>3</sup> H] Paroxetine  |
| <b>Vehicle:</b>              | 1% DMSO                                       | <b>Non-Specific Ligand:</b>   | 10.0 μM Imipramine                    |
| <b>Incubation Time/Temp:</b> | 60 minutes @ 25°C                             | <b>Specific Binding:</b>      | 95% *                                 |
| <b>Incubation Buffer:</b>    | 50 mM Tris-HCl, pH 7.4, 120 mM NaCl, 5 mM KCl | <b>Quantitation Method:</b>   | Radioligand Binding                   |
| <b>Kd:</b>                   | 0.078 nM *                                    | <b>Significance Criteria:</b> | ≥50% of max stimulation or inhibition |
|                              |                                               | <b>Bmax:</b>                  | 4.40 pmole/mg Protein *               |

\* Historical Values

## Reference Compounds

| Cat #  | Assay Name                                 | Reference Compound                | Historical         |                |                | Concurrent |                    |
|--------|--------------------------------------------|-----------------------------------|--------------------|----------------|----------------|------------|--------------------|
|        |                                            |                                   | IC <sub>50</sub> * | K <sub>i</sub> | n <sub>H</sub> | Batch *    | IC <sub>50</sub> * |
| 200510 | Adenosine A <sub>1</sub>                   | R(-)-PIA                          | 0.83 μM            | 0.49 μM        | 0.90           | 317535     | 0.36 μM            |
| 200610 | Adenosine A <sub>2A</sub>                  | CGS-21680                         | 0.13 μM            | 0.079 μM       | 1.0            | 317540     | 0.11 μM            |
| 200720 | Adenosine A <sub>3</sub>                   | IB-MECA                           | 0.78 nM            | 0.72 nM        | 0.80           | 317577     | 0.91 nM            |
| 203100 | Adrenergic α <sub>1A</sub>                 | Prazosin                          | 0.69 nM            | 0.28 nM        | 0.90           | 317536     | 0.25 nM            |
| 203200 | Adrenergic α <sub>1B</sub>                 | Prazosin                          | 0.27 nM            | 0.15 nM        | 1.0            | 317547     | 0.16 nM            |
| 203400 | Adrenergic α <sub>1D</sub>                 | Prazosin                          | 0.88 nM            | 0.43 nM        | 0.70           | 317537     | 0.68 nM            |
| 203620 | Adrenergic α <sub>2A</sub>                 | Yohimbine                         | 8.40 nM            | 3.10 nM        | 0.90           | 317534     | 4.48 nM            |
| 204010 | Adrenergic β <sub>1</sub>                  | S(-)-Propranolol                  | 2.50 nM            | 1.40 nM        | 0.80           | 317532     | 0.86 nM            |
| 204110 | Adrenergic β <sub>2</sub>                  | S(-)-Propranolol                  | 0.78 nM            | 0.54 nM        | 1.20           | 317533     | 0.28 nM            |
| 285010 | Androgen (Testosterone) AR                 | Testosterone                      | 6.50 nM            | 4.30 nM        | 1.0            | 317485     | 3.27 nM            |
| 212510 | Bradykinin B <sub>1</sub>                  | (Des-Arg <sup>10</sup> )-Kallidin | 0.87 nM            | 0.22 nM        | 1.10           | 317578     | 0.42 nM            |
| 212620 | Bradykinin B <sub>2</sub>                  | Bradykinin                        | 1.80 nM            | 1.10 nM        | 1.0            | 317579     | 1.17 nM            |
| 214510 | Calcium Channel L-Type, Benzothiazepine    | Diltiazem                         | 0.036 μM           | 0.032 μM       | 0.90           | 317482     | 0.021 μM           |
| 214600 | Calcium Channel L-Type, Dihydropyridine    | Nitrendipine                      | 0.72 nM            | 0.46 nM        | 0.90           | 317531     | 0.26 nM            |
| 216000 | Calcium Channel N-Type                     | ω-Conotoxin GVIA                  | 0.034 nM           | 0.028 nM       | 1.60           | 317580     | 0.026 nM           |
| 217030 | Cannabinoid CB <sub>1</sub>                | R(+)-WIN-55,212-2                 | 0.20 μM            | 0.15 μM        | 0.70           | 317529     | 0.26 μM            |
| 219500 | Dopamine D <sub>1</sub>                    | R(+)-SCH-23390                    | 1.40 nM            | 0.70 nM        | 0.90           | 317541     | 1.56 nM            |
| 219700 | Dopamine D <sub>2S</sub>                   | Spiperone                         | 0.25 nM            | 0.089 nM       | 1.0            | 317543     | 0.086 nM           |
| 219800 | Dopamine D <sub>3</sub>                    | Spiperone                         | 0.36 nM            | 0.12 nM        | 0.90           | 317544     | 0.21 nM            |
| 219900 | Dopamine D <sub>4.2</sub>                  | Spiperone                         | 0.50 nM            | 0.20 nM        | 0.90           | 317552     | 0.30 nM            |
| 224010 | Endothelin ET <sub>A</sub>                 | Endothelin-1                      | 0.23 nM            | 0.14 nM        | 1.10           | 317641     | 0.17 nM            |
| 224110 | Endothelin ET <sub>B</sub>                 | Endothelin-1                      | 0.13 nM            | 0.060 nM       | 0.90           | 317642     | 0.054 nM           |
| 225510 | Epidermal Growth Factor (EGF)              | EGF (human)                       | 1.60 nM            | 1.10 nM        | 1.10           | 317582     | 0.97 nM            |
| 226010 | Estrogen ERα                               | Diethylstilbestrol                | 0.77 nM            | 0.22 nM        | 1.0            | 317583     | 0.81 nM            |
| 226600 | GABA <sub>A</sub> , Flunitrazepam, Central | Diazepam                          | 0.016 μM           | 0.013 μM       | 0.80           | 317545     | 0.027 μM           |
| 226500 | GABA <sub>A</sub> , Muscimol, Central      | GABA                              | 0.032 μM           | 0.026 μM       | 0.90           | 317556     | 0.025 μM           |
| 228610 | GABA <sub>B1A</sub>                        | CGP-54626                         | 6.40 nM            | 2.90 nM        | 1.0            | 317584     | 4.56 nM            |
| 232030 | Glucocorticoid                             | Dexamethasone                     | 3.80 nM            | 1.80 nM        | 0.90           | 317476     | 2.98 nM            |
| 232700 | Glutamate, Kainate                         | L-Glutamic acid                   | 0.24 μM            | 0.17 μM        | 0.80           | 317586     | 0.18 μM            |
| 232810 | Glutamate, NMDA, Agonism                   | L-Glutamic acid                   | 0.41 μM            | 0.37 μM        | 0.90           | 317587     | 0.18 μM            |
| 232910 | Glutamate, NMDA, Glycine                   | MDL 105,519                       | 0.022 μM           | 0.021 μM       | 0.60           | 317588     | 9.38 nM            |
| 233000 | Glutamate, NMDA, Phencyclidine             | Dizocilpine ((+)-MK-801)          | 5.10 nM            | 3.40 nM        | 0.70           | 317557     | 4.71 nM            |
| 239610 | Histamine H <sub>1</sub>                   | Pyrilamine                        | 3.30 nM            | 1.60 nM        | 1.0            | 317546     | 2.50 nM            |
| 239710 | Histamine H <sub>2</sub>                   | Tiotidine                         | 0.022 μM           | 0.018 μM       | 1.10           | 317514     | 0.020 μM           |
| 239820 | Histamine H <sub>3</sub>                   | R(-)-α-Methylhistamine (RAMH)     | 2.30 nM            | 1.10 nM        | 1.10           | 317553     | 1.74 nM            |
| 241000 | Imidazoline I <sub>2</sub> , Central       | Idazoxan                          | 0.012 μM           | 8.0 nM         | 1.0            | 317539     | 7.50 nM            |
| 243520 | Interleukin IL-1                           | IL-1β                             | 0.19 nM            | 0.14 nM        | 1.30           | 317484     | 0.22 nM            |

\* Batch: Represents compounds tested concurrently in the same assay(s).

Broad Institute

Study #: AB13141, Quote #: 30266-1, Compound Code: BRD-K83634925-001-01-1 (1162315)

Tuesday, June 26, 2012

Page 26 of 28

## Reference Compounds

| Cat #  | Assay Name                                            | Reference Compound                               | Historical         |                |                | Concurrent |                    |
|--------|-------------------------------------------------------|--------------------------------------------------|--------------------|----------------|----------------|------------|--------------------|
|        |                                                       |                                                  | IC <sub>50</sub> * | K <sub>i</sub> | n <sub>H</sub> | Batch *    | IC <sub>50</sub> * |
| 250460 | Leukotriene, Cysteinyl CysLT <sub>1</sub>             | LTD <sub>4</sub>                                 | 0.70 nM            | 0.29 nM        | 1.0            | 317589     | 1.29 nM            |
| 251600 | Melatonin MT <sub>1</sub>                             | Melatonin                                        | 0.21 nM            | 0.11 nM        | 0.70           | 317513     | 0.45 nM            |
| 252610 | Muscarinic M <sub>1</sub>                             | 4-DAMP                                           | 4.50 nM            | 1.10 nM        | 1.0            | 317554     | 3.64 nM            |
| 252710 | Muscarinic M <sub>2</sub>                             | 4-DAMP                                           | 0.055 μM           | 0.023 μM       | 1.0            | 317527     | 0.024 μM           |
| 252810 | Muscarinic M <sub>3</sub>                             | 4-DAMP                                           | 5.10 nM            | 2.50 nM        | 1.10           | 317528     | 4.70 nM            |
| 257010 | Neuropeptide Y Y <sub>1</sub>                         | Neuropeptide Y (human, rat)                      | 0.22 nM            | 0.21 nM        | 1.10           | 317468     | 0.44 nM            |
| 257110 | Neuropeptide Y Y <sub>2</sub>                         | Neuropeptide Y (13-36) (porcine)                 | 0.21 nM            | 0.12 nM        | 0.90           | 317592     | 0.35 nM            |
| 258590 | Nicotinic Acetylcholine                               | Epibatidine                                      | 0.076 nM           | 0.052 nM       | 0.90           | 317521     | 0.12 nM            |
| 258700 | Nicotinic Acetylcholine α <sub>1</sub> , Bungarotoxin | α-Bungarotoxin                                   | 1.10 nM            | 0.72 nM        | 1.10           | 317522     | 1.30 nM            |
| 260130 | Opiate δ <sub>1</sub> (OP <sub>1</sub> , DOP)         | Naltrindole                                      | 0.91 nM            | 0.16 nM        | 1.0            | 317525     | 1.23 nM            |
| 260210 | Opiate κ (OP <sub>2</sub> , KOP)                      | U-69593                                          | 0.016 μM           | 6.40 nM        | 0.5            | 317524     | 0.013 μM           |
| 260410 | Opiate μ (OP <sub>3</sub> , MOP)                      | DAMGO                                            | 0.020 μM           | 8.10 nM        | 0.60           | 317526     | 0.019 μM           |
| 264500 | Phorbol Ester                                         | PMA                                              | 0.79 nM            | 0.59 nM        | 1.0            | 317558     | 0.69 nM            |
| 265010 | Platelet Activating Factor (PAF)                      | PAF                                              | 0.28 nM            | 0.15 nM        | 0.90           | 317496     | 0.27 nM            |
| 265600 | Potassium Channel [K <sub>ATP</sub> ]                 | Glyburide                                        | 5.70 nM            | 0.65 nM        | 0.80           | 317559     | 2.80 nM            |
| 265900 | Potassium Channel hERG                                | Astemizole                                       | 2.60 nM            | 2.10 nM        | 1.10           | 317560     | 6.16 nM            |
| 268420 | Prostanoid EP <sub>4</sub>                            | Prostaglandin E <sub>2</sub> (PGE <sub>2</sub> ) | 1.10 nM            | 0.45 nM        | 0.90           | 317561     | 0.61 nM            |
| 268700 | Purinergic P <sub>2X</sub>                            | α, β-Methylene ATP                               | 0.082 μM           | 0.018 μM       | 1.10           | 317590     | 0.029 μM           |
| 268810 | Purinergic P <sub>2Y</sub>                            | ATP                                              | 0.018 μM           | 0.018 μM       | 0.90           | 317591     | 0.038 μM           |
| 270000 | Rolipram                                              | Rolipram                                         | 5.70 nM            | 2.10 nM        | 1.0            | 317562     | 2.66 nM            |
| 271110 | Serotonin (5-Hydroxytryptamine) 5-HT <sub>1A</sub>    | Metergoline                                      | 4.10 nM            | 2.30 nM        | 0.90           | 317510     | 2.45 nM            |
| 271700 | Serotonin (5-Hydroxytryptamine) 5-HT <sub>2B</sub>    | Ketanserin                                       | 0.29 μM            | 0.18 μM        | 0.60           | 317551     | 0.53 μM            |
| 271910 | Serotonin (5-Hydroxytryptamine) 5-HT <sub>3</sub>     | MDL 72222                                        | 0.011 μM           | 2.50 nM        | 0.80           | 317593     | 0.018 μM           |
| 278110 | Sigma σ <sub>1</sub>                                  | Haloperidol                                      | 0.021 μM           | 8.80 nM        | 0.90           | 317523     | 8.84 nM            |
| 255520 | Tachykinin NK <sub>1</sub>                            | L-703,606                                        | 3.60 nM            | 2.60 nM        | 1.0            | 317474     | 1.56 nM            |
| 285900 | Thyroid Hormone                                       | Triiodothyronine                                 | 0.034 nM           | 0.018 nM       | 1.0            | 317488     | 0.040 nM           |
| 220320 | Transporter, Dopamine (DAT)                           | GBR-12909                                        | 1.70 nM            | 1.30 nM        | 0.90           | 317469     | 0.59 nM            |
| 226400 | Transporter, GABA                                     | NO-711                                           | 0.20 μM            | 0.20 μM        | 1.10           | 317538     | 0.21 μM            |
| 204410 | Transporter, Norepinephrine (NET)                     | Desipramine                                      | 0.93 nM            | 0.92 nM        | 0.60           | 317520     | 0.44 nM            |
| 274030 | Transporter, Serotonin (5-Hydroxytryptamine) (SERT)   | Fluoxetine                                       | 8.60 nM            | 1.40 nM        | 0.90           | 317549     | 0.013 μM           |

\* Batch: Represents compounds tested concurrently in the same assay(s).

Broad Institute

Study #: AB13141, Quote #: 30266-1, Compound Code: BRD-K83634925-001-01-1 (1162315)

Tuesday, June 26, 2012

Page 27 of 28



## Appendix Notes

The assay # 232020 Glucocorticoid (Ricerca Taiwan Ltd.) was replaced with # 232030 Glucocorticoid (Invitrogen #PV4690). The used material for membrane source was changed from in house to commercial supplier to simplify work process.

Assay #279510 sodium channel site 2 was removed due to backorder of radioligand from the supplier.
